1 **Overlapping attentional networks yield divergent behavioral predictions across tasks:**  
2 **Neuromarkers for diffuse and focused attention?**

3

4

Abbreviated title: Divergent predictions from attentional networks

5

6 Esther X.W. Wu<sup>a,b</sup>, Gwenisha J. Liaw<sup>b</sup>, Rui Zhe Goh<sup>a</sup>, Tiffany T.Y. Chia<sup>b</sup>, Alisia M.J. Chee<sup>c</sup>,

7 Takashi Obana<sup>a,b,e</sup>, Monica D. Rosenberg<sup>f</sup>, B.T. Thomas Yeo<sup>b,c,d,g,h</sup>, & Christopher L.

8 Asplund<sup>a,b,d,e,g,h,\*</sup>

9

10 <sup>a</sup> Division of Social Sciences, Yale-NUS College, National University of Singapore, 16 College  
11 Ave West, Singapore 138527

12 <sup>b</sup> N.1 Institute for Health, National University of Singapore, 28 Medical Drive, #05-COR,  
13 Singapore 117456

14 <sup>c</sup> Department of Electrical and Computer Engineering, Faculty of Engineering, National  
15 University of Singapore, Block E4, Level 5, Room 42, 4 Engineering Drive 3, Singapore 117583

16 <sup>d</sup> Clinical Imaging Research Centre, Yong Loo Lin School of Medicine, 14 Medical Drive, #B1-  
17 01, Singapore 117599

18 <sup>e</sup> Department of Psychology, Faculty of Arts and Social Sciences, National University of  
19 Singapore, 5 Arts Link, Singapore, 117570

20 <sup>f</sup> Department of Psychology, University of Chicago, Chicago IL, USA 60637

21 <sup>g</sup> Centre for Cognitive Neuroscience, Duke-NUS Medical School, 8 College Road, Singapore  
22 169857

23 <sup>h</sup> Institute for Application of Learning Science and Educational Technology, National University  
24 of Singapore, Singapore 119077

25

26 \*To whom correspondence should be sent. Address: Yale-NUS College, 28 College Avenue  
27 West #01-501, Singapore 138533. Tel: +65 6601 3327. Email: [chris.asplund@yale-nus.edu.sg](mailto:chris.asplund@yale-nus.edu.sg).

28

29 Acknowledgements:

30 The authors would like to thank Mike Esterman for the GradCPT experiment and analysis code.

31 This work was supported by grants from the Singapore Ministry of Defence, DSO National

32 Laboratories, and Singapore Ministry of Education and Yale-NUS College start-up, all to

33 Asplund. It was also supported by an NUS Cross-Faculty Research Grant to Yeo and Asplund.

34 The authors have no conflicts of interest, financial or otherwise, with respect to their authorship  
35 or the publication of this article.

36

37 Number of pages for entire document (85), main text (52)

38 Number of figures (9), tables (3), multimedia (0) and 3D models (0)

39 Number of words for Abstract (250), Introduction (648), and Discussion (1497)

40  
41  
42  
43  
44  
45  
46  
47  
48  
49  
50  
51  
52  
53  
54  
55  
56  
57  
58  
59  
60  
61  
62

## Abstract

Attention is a critical cognitive function, allowing humans to select, enhance, and sustain focus on information of behavioral relevance. Attention contains dissociable neural and psychological components. Nevertheless, some brain networks support multiple attentional functions. Connectome-based Predictive Models (CPM), which associate individual differences in task performance with functional connectivity patterns, provide a compelling example. A sustained attention network model (saCPM) successfully predicted performance for selective attention, inhibitory control, and reading recall tasks. Here we constructed a visual attentional blink (VAB) model (vabCPM), comparing its performance predictions and network edges associated with successful and unsuccessful behavior to the saCPM's. In the VAB, attention devoted to a target often causes a subsequent item to be missed. Although frequently attributed to attentional limitations, VAB deficits may attenuate when participants are distracted or deploy attention diffusely. Participants (n=73; 24 males) underwent fMRI while performing the VAB task and while resting. Outside the scanner, they completed other cognitive tasks over several days. A vabCPM constructed from these data successfully predicted VAB performance. Strikingly, the network edges that predicted better VAB performance (positive edges) predicted *worse* selective and sustained attention performance, and vice versa. Predictions from the saCPM mirrored these results, with the network's negative edges predicting better VAB performance. Furthermore, the vabCPM's positive edges significantly overlapped with the saCPM's negative edges, and vice versa. We conclude that these partially overlapping networks each have general attentional functions. They may indicate an individual's propensity to diffusely deploy attention, predicting better performance for some tasks and worse for others.

63

### Significance statement

64

A longstanding question in psychology and neuroscience is whether we have general

65

capacities or domain-specific ones. For such general capacities, what is the common function?

66

Here we addressed these questions using the attentional blink (AB) task and neuroimaging.

67

Individuals searched for two items in a stream of distracting items; the second item was often

68

missed when it closely followed the first. How often the second item was missed varied across

69

individuals, which was reflected in attention networks. Curiously, the networks' pattern of

70

function that was good for the AB was bad for other tasks, and vice versa. We propose that these

71

networks may represent not a general attentional ability, but rather the tendency to attend in a

72

less focused manner.

73

## Introduction

74

75

76

77

78

79

80

81

82

83

84

85

86

87

88

89

90

91

92

93

94

95

Attention is a critical cognitive function, allowing humans to select, enhance, and sustain focus on information of behavioral relevance. Visual attention plays numerous roles in different contexts, and it has been fractionated both behaviorally and neurally (Chun, Golomb, & Turk-Browne, 2011; Desimone & Duncan, 1995; Egeth & Yantis, 1997). In addition to such separable components, however, some brain networks support attentional processing across multiple domains (Asplund, Todd, Snyder, & Marois, 2010; Corbetta & Shulman, 2002; Duncan, 2010; Tamber-Rosenau, Dux, Tombu, Asplund, & Marois, 2013; Yeo, Krienen, et al., 2015). Recent studies using Connectome-based Predictive Models (CPM) support this idea. In a CPM approach, individual differences in behavioral performance are accounted for as a function of whole-brain functional connectivity patterns, after which performance for novel individuals can be predicted from fMRI data (Shen et al., 2017). Such predictions also apply across tasks. A sustained attention network model (saCPM) (Rosenberg, Finn, et al., 2016) could predict individual differences in performance for selective attention (Rosenberg, Hsu, Scheinost, Constable, & Chun, 2018), inhibitory control (Fountain-Zaragoza, Samimy, Rosenberg, & Prakash, 2019), and reading recall (Jangraw et al., 2018).

Here we constructed a CPM for the visual attentional blink (VAB), aiming to test whether that model could predict performance on a variety of tasks and to compare its predictions and network features to the saCPM's. In a VAB paradigm, participants search for two items in a stream of distractors; they often fail to perceive the second item, but only when it closely follows the first (200-500 ms) (Raymond, Shapiro, & Arnell, 1992). The VAB is critically dependent on attention, as no deficit occurs when the first item is ignored. Individuals differ in their VAB severity (rate of second item detection failures), and these differences are

96 typically large and stable (Dale, Dux, & Arnell, 2013). It is unclear, however, which cognitive  
97 and neural factors underlie them. Numerous theoretical explanations have been proposed for the  
98 VAB, including a temporary loss of control (Di Lollo, Kawahara, Shahab Ghorashi, & Enns,  
99 2005) or bottleneck-like processing limitations (Chun & Potter, 1995). VAB magnitude also  
100 correlates only weakly with most other attention tasks (Skogsberg et al., 2015).

101 Intriguingly, VAB performance sometimes improves when attention to its primary  
102 detection task is reduced. Such reductions can be due to manipulation (Olivers & Nieuwenhuis,  
103 2005, 2006) or dispositional factors (Dale & Arnell, 2010, 2015; Thomson, Ralph, Besner, &  
104 Smilek, 2015), and are thought to cause more diffuse attentional deployment. In particular, mind-  
105 wandering is associated with better VAB performance, though it has the opposite association for  
106 many other attention tasks (Gonçalves et al., 2017; Hu, He, & Xu, 2012; Robertson, Manly,  
107 Andrade, Baddeley, & Yiend, 1997; Smilek, Carriere, & Cheyne, 2010).

108 The VAB likely involves many factors (Dux & Marois, 2009), but which are reflected in  
109 individual differences of brain network function? To address this question using a CPM  
110 approach, we scanned 73 individuals while they performed the VAB task and while they rested.  
111 Resting state data allowed us to assess whether any predictive functional architecture persisted  
112 when participants were not engaged in attention-demanding tasks (Finn et al., 2015; Rosenberg,  
113 Finn, et al., 2016; Yoo et al., 2017). Outside the scanner, the same individuals completed  
114 cognitive tasks assessing sustained attention, selective attention, and fluid intelligence. We  
115 constructed a visual attentional blink CPM (vabCPM), from which we could make and assess  
116 predictions about the tasks. If attentional capacity predicts VAB performance, we would expect  
117 *positive* associations between vabCPM predictions for behavior and observed performance in  
118 other attention tasks. Conversely, if diffuse attentional tendencies predict VAB performance, we

119 might find significant *negative* associations between predicted and observed behavior for other  
120 attention tasks. For external validation, we made and assessed predictions about our tasks,  
121 including the VAB, using a sustained attention CPM (Rosenberg, Finn, et al., 2016). We then  
122 investigated and compared the networks associated with each model to better understand their  
123 relationship and potential psychological functions.

124

125

## Materials and Methods

126 The present study included numerous tasks, with a primary focus on the visual attentional  
127 blink (VAB). Additional tasks provided critical context and points of comparison for  
128 understanding the individual differences in VAB performance and neural features. These  
129 additional tasks included those related to goal-directed attention and fluid intelligence. Many of  
130 these tasks are conceptually linked to the VAB (Dux & Marois, 2009), and many have also been  
131 studied themselves using Connectome-based Predictive Modeling (Finn et al., 2015; Rosenberg,  
132 Finn, et al., 2016; Rosenberg et al., 2018). To facilitate comparisons across these different tasks,  
133 we re-coded all behavioral performance measures such that positive numbers indicated better  
134 performance (e.g. higher accuracy or faster reaction times; see details below).

135

### Experimental design

136 *Participants.* Eighty-two participants with self-reported normal or corrected-to-normal  
137 vision and normal hearing were recruited from the National University of Singapore (NUS)  
138 community. These individuals began a six-session study that included numerous behavioral and  
139 neuroimaging components, a subset of which are reported and analyzed here. Eight participants  
140 did not continue with the experiment after the first practice session (Session 0) and were  
141 excluded from the following analyses. One participant who did not achieve a target

142 discrimination score of 75% in the main VAB task (Session 1) was also excluded. Thus, unless  
143 otherwise stated, the following analyses included data from 73 participants (24 males) between  
144 the ages of 19-30 ( $M = 22.25$ ,  $SD = 1.84$ ). All participants provided written informed consent in  
145 accordance with a protocol approved by the NUS Institutional Review Board and received  
146 monetary compensation.

147 *Stimulus presentation.* All sessions took place either inside the MR scanner or in the  
148 laboratory over a span of 3 weeks (see Table 1-1 of Extended Data for complete and detailed  
149 experimental protocol). Inside the scanner, stimuli were presented at a viewing distance of 91 cm  
150 on a 32-inch LCD monitor (NordicNeuroLab, Bergen, Norway) with a screen refresh rate of 60  
151 Hz, connected to a MacBook Air (OS 10.12.1) running PsychoPy (Peirce, 2007). Participants  
152 made responses using an MR-compatible button box. In the laboratory, stimuli were presented at  
153 a distance of 57 cm on a 22-inch LCD monitor (Samsung SyncMaster 2233) with a screen  
154 refresh rate of 60 Hz using an NVIDIA Quadro FX 3450/4000 SD graphics card on Windows 7.  
155 Participants' responses were captured on a standard computer keyboard. Auditory stimuli were  
156 presented using PsychoPy (Peirce, 2007) binaurally through Creative headphones.

157 *Overview of task domains and specific tasks.* The tasks in this study all investigated  
158 cognitive processing, primarily different forms of attention (Table 1). Each task is detailed  
159 below, organized by task domain. The task domains included the Attentional Blink, Sustained  
160 Attention, Selective Attention, and Fluid Intelligence.

161  
162 Table 1. Schedule of tasks and data used in analysis. Participants were encouraged to take breaks  
163 between the tasks to prevent fatigue. With the exception of the Raven's Progressive Matrices  
164 test, each task was performed twice on non-successive days. Task domains and tasks were as



165 follows. Attentional Blink: Visual Attentional Blink (VAB) and Auditory Attentional Blink  
166 (AAB). Sustained Attention: Visual Sustained Attention to Response Task (VSART), Auditory  
167 Sustained Attention to Response Task (ASART), and Gradual-onset Continuous Performance  
168 Task (GradCPT). Selective Attention: Attentional Network Task (ANT). Fluid Intelligence:  
169 Raven's Progressive Matrices test (Raven's).

| Session | Days after previous session | Task                | Data used in analysis |
|---------|-----------------------------|---------------------|-----------------------|
| 0       | 0                           | VAB (practice)      | Behavior              |
|         |                             | Resting state       | FMRI                  |
| 1       | 3 to 14                     | VAB (in scanner)    | FMRI, Behavior        |
|         |                             | ANT, VSART          | Behavior              |
| 2       | 1                           | AAB, GradCPT, ASART | Behavior              |
| 3       | 1                           | ANT, VSART, Raven's | Behavior              |
| 4       | 1                           | AAB, GradCPT, ASART | Behavior              |
| 5       | 1 to 10                     | VAB (in scanner)    | Behavior              |

170

171

172 *Attentional Blink.* Participants completed a visual attentional blink (VAB) and an  
173 auditory attentional blink (AAB) task. They were designed to be generally similar (Figure 1).  
174 Both versions were built around target discrimination and a probe detection, with each item  
175 embedded within a stream of distractors. Our main task of interest is the VAB, for which  
176 neuroimaging data was collected concurrently. For the AAB and all other tasks, only behavioral  
177 data were collected.

178

### Visual Attentional Blink task

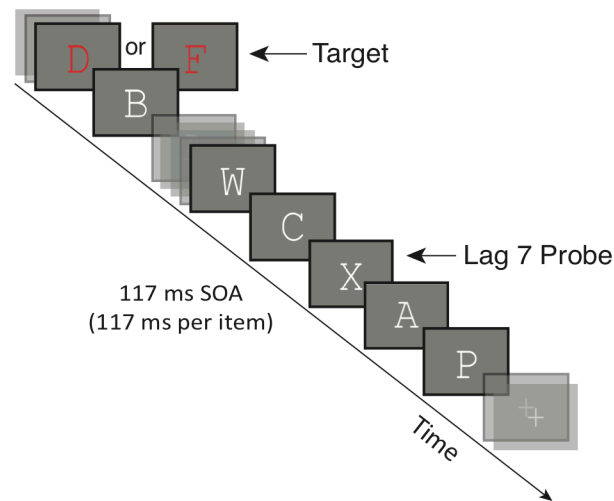

179

180 Figure 1. Experimental paradigm for the visual attentional blink (VAB) task. Participants  
181 identified a target and then detected a probe within a stream of distractors, responding when  
182 prompted at the conclusion of the stream. The target was a red letter, the probe was a white letter  
183 X, and distractors were other white letters. The auditory attentional blink (AAB) task was  
184 similar, save targets were complex tones, the probe was a high-pitched pure tone, and distractors  
185 were other pure tones. SOA = stimulus onset asynchrony.

186

187 For the VAB, stimuli consisted of upper-case letters presented in Courier New Font on a  
188 dark gray background (Figure 1). Targets were red letters D or F, whereas the probe was a white  
189 letter X. Distractors were white letters save D, F, X, I, L, O, and Q. Targets and probes were  
190 embedded within a rapid serial presentation stream, with no items repeated during each trial. The  
191 stimulus onset asynchrony (SOA) between successive items in the 16-stimulus stream was 117  
192 ms (no gap). A target appeared during every trial at serial position 3, 4, or 5, whereas the probe  
193 appeared during 75% of trials. When present, the probe appeared at lags 1, 2, 3, 5, 7, or 9 relative

194 to the target, with the same number of trials per lag condition in each block. The first three lags  
195 were expected to be within the AB window, whereas the last three were expected to be outside it.  
196 In a small percentage of trials (14%), an irrelevant surprise stimulus (randomly selected from a  
197 set of 24 grayscale male faces and 24 colorful objects) was presented at lags 2 or 6 relative to the  
198 target. These surprise stimuli are not relevant to this current study; trials containing surprises  
199 were excluded from the following analyses and are not reported further.

200 Each 6.25-second trial began with the presentation of a white fixation cross ( $0.8^\circ \times 0.8^\circ$ )  
201 for 500 ms, which became larger ( $1.0^\circ \times 1.0^\circ$ ) and turned yellow to signify that the rapid serial  
202 visual presentation (RSVP) stream would begin in 750 ms. Participants searched this RSVP  
203 stream (1867 ms) for the target and probe, which they then indicated by button box press after a  
204 blank gap (233 ms) at the trial's conclusion. A maximum of 2.9 s was given for participants to  
205 respond to both the target and probe response prompts. After this period, no further responses  
206 were recorded and the white fixation cross returned until the start of the next trial. Failure to  
207 respond was rare: No session had more than 0.16% no-target response trials or 0.64% no-probe  
208 response trials averaged across participants, and no participant had more than 3.57% (target) or  
209 4.17% (probe) no-response trials in any given session. The timing between each trial was  
210 optimized for functional Magnetic Resonance Imaging (fMRI). As such, it followed an  
211 exponential distribution with a range of 1.25-10 s and mean of 3.75 s. Each session contained six  
212 blocks of 28 trials each, with the trials presented in a pseudorandom order. The 168 trials took  
213 approximately 40 minutes to complete, including breaks. Before the main experimental blocks in  
214 each session, each participant completed 3 practice blocks of 8 trials each. The first block  
215 contained targets but no probes; the second block contained probes but no targets; and the third  
216 block contained both.

217 For the AAB, targets were low-pitched or high-pitched complex tones comprised of five  
218 log-related frequencies (794 to 1260 Hz, or 1349 to 2142 Hz), whereas the probe was a 4000 Hz  
219 pure tone. Distractors were 19 pure tones of log-related frequencies ranging from 697 to 2911  
220 Hz. Sound stimuli were adjusted to have equal mean absolute amplitudes, after which the probe  
221 and distractor intensities were set to 45% and 30% of the target intensity (~70 dB). These values  
222 were based on performance in Obana, Lim, & Asplund (under review) and additional pilot tests.  
223 As in the visual task, a small percentage of auditory trials (14%) contained an irrelevant surprise  
224 stimulus, randomly selected from a set of 24 sounds (including an alarm, a cough, and spoken  
225 letters), presented at lags 2 or 6 relative to the target. Again, surprise trials were not analyzed  
226 here. With the exception of a change in stimuli, trial structure was identical to the VAB.

227 Each 6.25-second trial began with a reminder of the target and probe sounds, which were  
228 played for 110 ms each with a gap of 85 ms. After 750 ms, the rapid auditory stream (RAP)  
229 began, through which participants searched for the target and probe. Similar to the visual task,  
230 the identity of the target and the presence of the probe were indicated by keypress after a blank  
231 gap (233 ms). Response prompts for the target and probe then appeared, with a maximum  
232 allowed time of 2.9 s for both responses. The timing between each trial was fixed at 0.75 s.  
233 Except for the blank gap and the response prompts, a white fixation cross ( $0.8^\circ \times 0.8^\circ$ ) was  
234 shown on the screen throughout the block. Each session contained three blocks of 56 trials each,  
235 with the trials presented in a pseudorandom order. The 168 trials took approximately 25 minutes  
236 to complete, including breaks. Before the main experimental blocks in each session, each  
237 participant completed 3 practice blocks of 8 trials each. The first block contained targets but no  
238 probes; the second block contained probes but no targets; and the third block contained both.

239 Before beginning each practice and task block of the auditory task, participants could play the  
240 target and probe sounds as many times as desired.

241 *Sustained attention.* To better understand VAB performance in relation to other forms of  
242 attention and their neural underpinnings, we also ran three sustained attention tasks. These  
243 paradigms included the visual and auditory versions of the Sustained Attention to Response Task  
244 (SART; Robertson, Manly, Andrade, Baddeley, & Yiend, 1997), which we adapted from Seli,  
245 Cheyne, Barton, & Smilek (2012), and the Gradual-Onset Continuous Performance Task  
246 (GradCPT; Esterman, Noonan, Rosenberg, & DeGutis, 2013; Rosenberg, Noonan, DeGutis, &  
247 Esterman, 2013). The SART has been frequently used to examine moment-to-moment  
248 fluctuations of sustained attention, requiring participants to make continuous responses to most  
249 stimuli but withhold responses to a few. However, due to its trial-based structure, which may  
250 provide a short ‘break’ between trials and not tax attention sufficiently, the GradCPT was later  
251 designed to present images that gradually transition from one to the next using a linear pixel-by-  
252 pixel interpolation. The GradCPT has been shown to show reliable and large interindividual  
253 variability amongst high-functioning young adults, such as those in our sample (Rosenberg,  
254 Finn, et al., 2016; Rosenberg et al., 2013).

255 In the VSART, participants were presented single digits, one after another, in the center  
256 of the display screen. They were asked to press the spacebar if they saw a number from 1 to 9,  
257 but withhold their response if they saw the number 3. Each digit was presented for 250 ms,  
258 followed by an encircled “x” mask for 900 ms. Digits were presented in Symbol font in white,  
259 against a black background, at sizes 0.57°, 1.03°, 1.43°, 1.89°, 2.35° of visual angle. The order of  
260 the digits and their sizes were randomized. Participants completed 675 trials (~ 13.5 mins) in  
261 each session.

262 For the ASART, stimuli consisted of spoken single numbers. As in the visual task,  
263 participants were asked to press the spacebar when they heard the numbers 1 to 9, but to  
264 withhold their response if they heard the number 3. The numbers were presented in random  
265 order, each for 250 ms, following by a pink noise mask of 900 ms. Throughout the experiment,  
266 participants maintained fixation on a cross in the middle of the display. Each session consisted of  
267 675 trials (~13.5 mins).

268 The GradCPT (Rosenberg et al., 2013) consisted of images that gradually transitioned  
269 from one to the next using a linear pixel-by-pixel interpolation (ISI = 800 ms). Images consisted  
270 of 10 mountain and 10 city scenes, randomly presented with 10% and 90% probability,  
271 respectively, without repeats in consecutive images. Participants were instructed to press the  
272 spacebar when a city scene was presented, but to withhold their response when a mountain scene  
273 was presented. To tax sustained attention sufficiently, the GradCPT was performed in a single  
274 block over a relatively long duration (15 min).

275 *Selective attention.* To understand the AB's relationship to other selective attention tasks  
276 and their neural underpinnings, we also employed the Attentional Network Task (ANT), by Fan,  
277 McCandliss, Sommer, Raz, & Posner (2002). This paradigm was designed to test three separable  
278 components of selective attention: alerting, orienting and executive control (Posner & Petersen,  
279 1990) within a single experimental session. Stimuli consisted of 5 black lines (some with  
280 arrowheads) arranged horizontally in a row, against a grey background. The target, always an  
281 arrow in the center, was flanked on each side by (i) two arrows pointing in the same direction as  
282 the target (congruent condition), (ii) two arrows pointing in the opposite direction from the target  
283 (incongruent condition), or (iii) two black lines without arrowheads (neutral condition). Each line  
284 or arrow measured  $0.55^\circ$  horizontally, and the space between two adjacent objects measured

285 0.06°. To trigger attention orienting, all stimuli were presented either 1.06° above or below a  
286 central fixation cross. Participants were asked to keep their eyes fixated on the fixation cross and  
287 respond whether the target was pointing right or left.

288 Each trial started with a central fixation cross (400 – 1600 ms), followed by a warning  
289 cue (100 ms), a second central fixation cross (400 ms), and finally, the stimuli consisting of  
290 target and flankers presented either above or below a central fixation cross. Target and flankers  
291 were presented for 1700 ms, or until a response was made, whichever was shorter. A fixation  
292 cross was then presented until the end of trial (4000 ms after the first fixation period). For the  
293 warning cue, four types of cues were presented: (i) no cue (a central fixation cross, similar to that  
294 presented during the first and second fixation period, was presented), (ii) a center cue (an asterisk  
295 was presented in the center, thus alerting the participant to the impending stimuli presentation),  
296 (iii) double cue (two asterisks were presented above and below a central fixation cross, at both  
297 possible locations of the target), and (iv) a spatial cue (an asterisk was presented at the  
298 impending location of the target). Participants completed 3 blocks of 96 trials (4 cue conditions x  
299 2 target locations x 2 target directions x 2 repetitions), with trials presented in random order. The  
300 entire task lasted about 30 min.

301 *Fluid intelligence.* As a final comparison domain for understanding VAB performance  
302 and the associated neural underpinnings, we measured fluid intelligence. Participants completed  
303 a shortened, nine-item version (Form A; Bilker et al., 2012) of the original 60-item Raven's  
304 Standard Progressive Matrices (Raven, Raven, & Court, 1998). The task was completed on a  
305 laboratory computer, and there were no response time limits. The task consists of pattern  
306 matching questions designed to measure abstract reasoning skills, and it has been typically used  
307 in clinical settings as a non-verbal test of fluid intelligence.

## 308 **Statistical analyses for behavioral data**

309           Participants had to meet a minimum target discrimination (letter D or F?) score of 75%  
310 for the VAB and 60% for the AAB to be included in the final sample. As a result, 73 sets of data  
311 were available for all tasks, with the exception of the AAB task (n=71). For the AAB, two  
312 additional participants were excluded because their target discrimination performance did not  
313 meet the minimum threshold in each session. For all behavioral comparisons,  $p$ -values were  
314 based on two-tailed comparisons. We also did not correct any behavioral comparisons for  
315 multiple corrections, as we wanted to find any normality violations and used the task correlations  
316 to identify any relationships that might affect our CPM results.

317           The computation of each behavioral measure is detailed in the following sections, again  
318 organized by task domain. To obtain stable behavioral metrics, we computed a ‘best score’ for  
319 each task metric. When data was available across two different sessions, the final score was  
320 averaged across both sessions. (When data was available only from a single session, the final  
321 score set to that session’s.) We assessed whether the distribution of ‘best scores’ for each metric  
322 departed from normality using Jarque-Bera tests. As many normality violations were found, we  
323 used Spearman correlations of the ‘best scores’ to compare each pair of tasks. For tasks with two  
324 sessions, we also calculated test-retest reliability. Due to the aforementioned normality  
325 violations, Spearman correlations were again used.

326           *Attentional blink.* The VAB and AAB deficits were calculated in the same way. For each  
327 participant, we first computed the mean probe detection accuracy for each lag condition,  
328 contingent upon correct identification of the target. Probe detection accuracy scores were then  
329 averaged across short-lag (lags 1, 2, or 3) and long-lag (lags 5, 7, 9) conditions. The former  
330 condition was expected to be within the attentional blink window, whereas the latter condition



331 was expected to be outside it. The AB deficit was computed by regressing out the long-lag scores  
332 from the short-lag scores of each participant (short-lag scores  $\sim$  long-lag scores), and then saving  
333 the residuals (MacLean & Arnell, 2012). Larger and positive values indicated smaller attentional  
334 deficits, and thus better task performance. Note that simply subtracting the short-lag from the  
335 long-lag scores yielded highly similar VAB deficit scores ( $r(71) = .955$ ). Visual AB scores  
336 (VABresid) were obtained from sessions 1 and 5, and the auditory AB scores (AABresid) were  
337 obtained from sessions 2 and 4.

338 *Sustained attention.* D-prime values were computed for the VSART, ASART and  
339 GradCPT, with larger values indicative of better performance in sustained attention. VSART  
340 scores (VSARTdprime) were obtained from sessions 1 and 3, ASART scores (ASARTdprime)  
341 were obtained from sessions 2 and 4, and GradCPT scores (GradCPTdprime) were obtained from  
342 sessions 2 and 4.

343 *Selective attention.* To measure overall task performance in the ANT task, we computed  
344 the mean error rate (ANTerr) across all trials and the intra-individual variability of RTs  
345 (ANTrtvar) for each participant. Intra-individual RT variability was computed as the standard  
346 deviation divided by mean of correct-trial RTs. Arguably, this metric is a more sensitive measure  
347 of task performance than mean error rate (Rosenberg et al., 2018; Wojtowicz, Berrigan, & Fisk,  
348 2012), with higher RT variability being linked to lower accuracy in ANT tasks (Adolfsdottir,  
349 Sorensen, & Lundervold, 2008; Lundervold et al., 2011).

350 We also calculated metrics for each attentional network in the ANT, which putatively  
351 reflect their efficiencies. To do so, we compared the RTs between different trial conditions for  
352 each participant (Fan et al., 2002; Rosenberg et al., 2018). For the alerting network, efficiency  
353 was computed by subtracting the mean RT of double-cue condition from the mean RT of the no-

354 cue condition (ANTaert). Larger values would indicate faster responses due to the cue and thus  
355 better task performance. For the orienting network, efficiency was computed by subtracting the  
356 mean RT of spatial-cue condition from the mean RT of the center-cue condition (ANToert), thus  
357 larger positive values would also imply faster responses due to the cue and better task  
358 performance. For the executive control network, efficiency was computed by subtracting the  
359 mean RT of the congruent condition from the mean RT of the incongruent condition (ANTcert).  
360 In this case, smaller values would imply less interference by the flanker arrows and better task  
361 performance. For all computations of efficiency with RTs, only trials with correct responses  
362 were included.

363 For easier comparisons with the other behavioral measures, we re-coded the raw values  
364 of mean error (ANTerr), RT variability (ANTrtvar), and executive control efficiency (ANTcert),  
365 multiplying them by -1 such that larger values would also imply better task performance. ANT  
366 scores were obtained from sessions 1 and 3.

367 *Fluid intelligence.* Accuracy scores for the nine-item Raven's test (RavensAcc) were  
368 computed for each participant, with higher scores implying better performance.

369

370 Table 2. Summary of behavioral metrics, including their task domain and a description of their  
371 calculation. Raw values for ANTerr, ANTrtvar and ANTcert were re-coded such that larger  
372 values indicated better task performance.

| Task domain         | Metric      | Description                                                          |
|---------------------|-------------|----------------------------------------------------------------------|
| Attentional Blink   | VABresid    | Residuals from regressing out long-lag scores from short-lag scores. |
|                     | AABresid    |                                                                      |
| Sustained Attention | VSARTdprime | Dprime scores.                                                       |

|                     |               |                                                                          |
|---------------------|---------------|--------------------------------------------------------------------------|
|                     | ASARTdprime   |                                                                          |
|                     | GradCPTdprime |                                                                          |
|                     | ANTerr        | Mean error across all trials.                                            |
|                     | ANTrtvar      | <i>SD/M</i> of correct-trial RTs.                                        |
| Selective Attention | ANTAert       | Alerting network efficiency. No-cue RT minus double-cue RT.              |
|                     | ANToert       | Orienting network efficiency. Center-cue RT minus spatial-cue RT.        |
|                     | ANTcert       | Executive control network efficiency. Incongruent RT minus congruent RT. |
| Fluid Intelligence  | RavensAcc     | Mean accuracy.                                                           |

373

374

### 375 **MRI data collection and initial processing**

376 *Acquisition.* MRI data were acquired at the Clinical Imaging Research Centre (Singapore)  
377 on a Siemens 3T MAGNETOM Prisma MRI scanner (Siemens, Erlangen, Germany) with a 32-  
378 channel head coil. Scanning parameters were adapted from the Human Connectome Project  
379 (HCP), and were chosen to ensure that full-brain coverage, including the cerebellum, was  
380 achieved for each participant. MRI data were acquired in Sessions 1 and 5 of the study, with the  
381 first session's data analyzed here. Each fMRI session started with a 5-min anatomical localizer  
382 scan, followed by four 8-min resting-state scans, six 5.25-min task-based (VAB task) scans, and  
383 a 5-min anatomical scan. During the resting-state runs, participants were asked to maintain  
384 fixation at a cross displayed in the center of the screen.

385 *Imaging parameters.* A 3D high-resolution (1 mm x 1 mm x 1 mm) T1-weighted  
386 MPRAGE pulse sequence was used to obtain whole-brain anatomical images for each  
387 participant, allowing for subsequent normalization to standard space. For each participant, 128 1-

388 mm thick contiguous sagittal slices (0.5 mm skip; 1 x 1 mm in-plane resolution) were acquired.  
389 Other scanning parameters included a repetition time (TR) of 2300 ms, an effective echo time  
390 (TE) of 2.22 ms, a flip angle of 8° and 260 mm field of view.

391 Functional MRI data were acquired with a multiband echoplanar imaging (MB-EPI;  
392 CMRR release R2015; Feinberg et al., 2010; Moeller et al., 2010; Xu et al., 2013) sequence with  
393 a MB acceleration factor of 8. 768 whole-brain images were obtained for each resting-state run  
394 while 504 images were acquired for each task-based run. T2\*-weighted images were acquired  
395 using a TR of 625 ms, a TE of 33.2 ms and FA of 50°. Interleaved slices (imaging matrix = 64 x  
396 64) were collected using a 220 mm field of view, with slice thickness at 2.50 mm (no gap). The  
397 effective voxel size was thus 2.5 x 2.5 x 2.5 mm<sup>3</sup>.

398 *Preprocessing.* Both task and localizer data were pre-processed using a previously  
399 published pipeline for functional connectivity analyses (Fong et al., 2019; Kong et al., 2019)  
400 publicly available at  
401 [https://github.com/ThomasYeoLab/CBIG/tree/master/stable\\_projects/preprocessing/CBIG\\_fmri](https://github.com/ThomasYeoLab/CBIG/tree/master/stable_projects/preprocessing/CBIG_fmri)  
402 [Preproc2016](#). Pre-processing steps across resting-state and task-based runs were the same,  
403 except when mentioned otherwise. First, the initial four frames from each run were removed to  
404 aid with BOLD signal stabilisation. Motion correction using FSL's MCFLIRT was then applied  
405 such that runs with more than 50% of the frames exceeding a motion threshold were discarded to  
406 ameliorate any contributions of head motion. The motion threshold was defined as frame  
407 displacement (FD) > 75 and frame-to-frame intensity (DVARs) > 0.2 (Power, Barnes, Snyder,  
408 Schlaggar, & Petersen, 2012). From this step, one task-based run (and no resting-state runs) was  
409 removed from our data. FSL's bbrregister function was used for intrasubject registration of the T1  
410 anatomical images to the T2\*-weighted images. The best run for each subject was used as the

411 registration file across all functional runs. Subsequently, motion parameters and their derivatives,  
412 the global whole brain signal, the white matter signal, the cerebral spinal fluid signal and linear  
413 trends were regressed out. Additionally, for task-based runs, we regressed out the haemodynamic  
414 response signal aligned to trial onset times. Frames with excessive motion, identified earlier on,  
415 were interpolated over (Power et al., 2014), and a temporal filter was applied to retain  
416 frequencies between 0.009 and 0.08 Hz. The resulting BOLD signal was projected to fsaverage6  
417 surface space and spatially smoothed with an isotropic Gaussian kernel of 6 mm (FWHM).

418 *Functional connectivity.* Functional connectivity was evaluated in fsaverage6 surface  
419 space for 400 cortical regions (Schaefer et al., 2017) and in MNI152 volumetric space for 19  
420 subcortical regions (including the brain stem, and the left and right hemispheres of the  
421 accumbens area, amygdala, caudate, cerebellum, ventral diencephalon, hippocampus, pallidum,  
422 putamen, and thalamus), with a total of 419 parcellations. For each run, the mean time course of  
423 all the parcellations were correlated using Pearson's product moment correlation, resulting in a  
424 419 (rows) x 419 (columns) correlation matrix, with  $(419 \times 419 - 419) / 2 = 87,571$  unique  
425 values. Each cell in the correlation matrix represents a functional connection (edge) between a  
426 pair of parcellations. Fisher r-to-z transformation was applied to increase normality (Van Dijk et  
427 al., 2010). For each participant, Fisher-transformed matrices for all four resting-state scans and  
428 all six task-based scans were averaged separately, forming two functional connectivity (FC)  
429 matrices: resting-state FC (RSFC) and Visual Attentional Blink task FC (VABFC).

430 *Motion control.* To reduce the effects of motion on functional connectivity, we adapted  
431 motion control procedures from Rosenberg et al. (2018) to remove edges that were correlated  
432 with motion. For each participant, we measured the following five motion parameters from their  
433 resting-state and task-based scans: (i) maximum displacement, (ii) maximum rotation, (iii) mean

434 frame-to-frame displacement, (iv) mean frame displacement (FD), and (v) mean frame-to-frame  
435 intensity (DVARs). Spearman's rank correlation was computed across participants between each  
436 edge in the FC matrix and each motion parameter. To be comparable with Rosenberg et al.  
437 (2018), in which 72.7% of edges remained after controlling for motion, we removed edges where  
438  $r > .275$  (two-tailed  $p < .02$ ), leaving 69,617 edges, or 79.50% of the initial 87,571 edges. Edges  
439 were removed from both VABFC and RSFC if they met the criteria for removal in either FC  
440 matrix.

#### 441 **General approach for Connectome-based Predictive Models (CPM)**

442 We adapted the Connectome-based Predictive Model (CPM) approach (Finn et al., 2015;  
443 Rosenberg, Finn, et al., 2016; Rosenberg et al., 2018; Shen et al., 2017) to predict individual  
444 differences in behavior from functional connectivity information (Figure 2). In the following  
445 section, we first describe our CPM procedure and then summarize our different models. Data  
446 from all 73 participants were included in these analyses (71 for models involving the AAB score,  
447 AABresid).

448

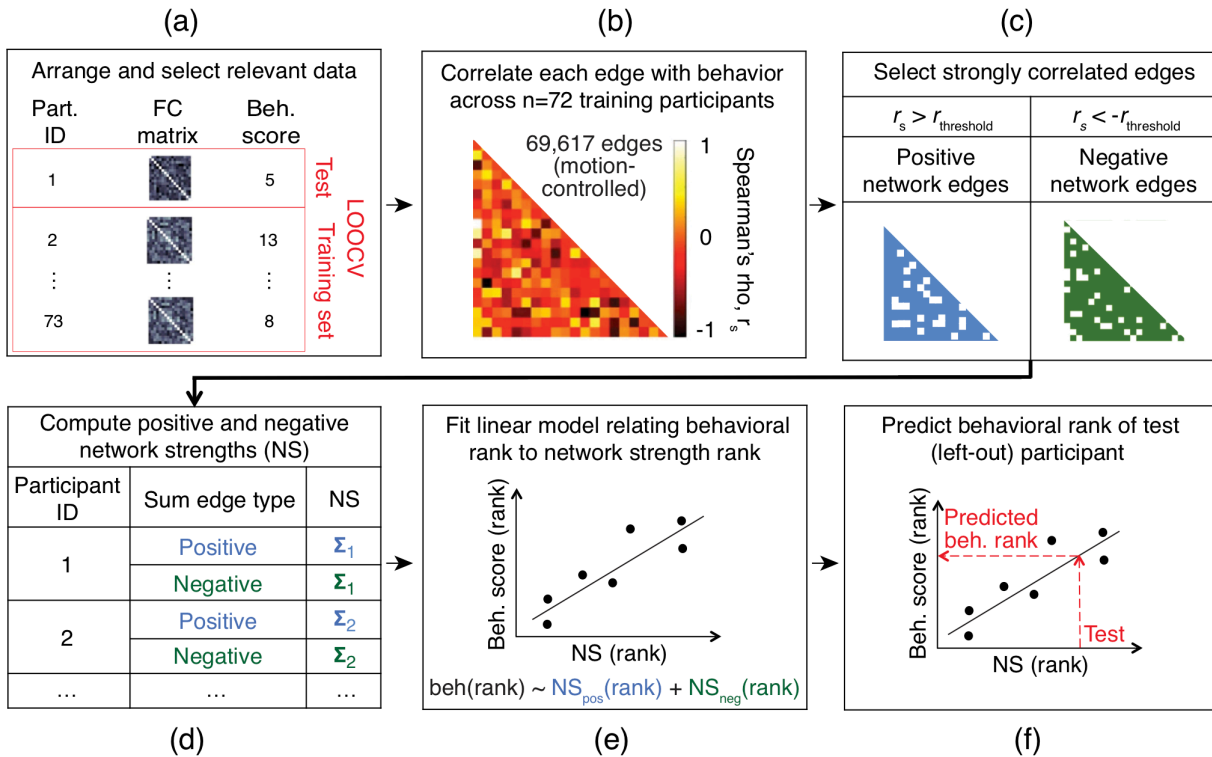

449

450 Figure 2. Procedure for Connectome-based Predictive Model (CPM) construction in the current

451 study (adapted from Shen et al., 2017). CPMs predict individual differences in behavior from

452 functional connectivity information. (a) Functional connectivity matrices and a behavioral score

453 of interest for each participant were calculated. One pair was held out of model construction for

454 each round of leave-one-out cross-validation (LOOCV) (Webb et al., 2011). (b) Functional

455 connectivity edges were correlated with behavior across participants. (c) Edges that correlated

456 most strongly, either positively or negatively, were selected. (d) Values from selected edges were

457 summed separately for positive and negative network edges, yielding two network strengths for

458 each participant. (e) A linear regression model relating (rank) network strengths to (rank)

459 behavioral scores was computed. (f) The model was tested on a novel, out-of-sample participant

460 (the individual left out in step (a)). After repeating steps a-f for each participant, the model was

461 evaluated by correlating the predicted behavioral scores with the actual scores.

462

463 *Model training.* We first selected an FC matrix (i.e., VABFC or RSFC) and a behavioral  
464 score (e.g., VABresid). As part of the leave-one-out cross-validation procedure (Figure 2a), we  
465 then set aside the data for one participant as test data and proceeded to train the model on the  
466 remaining data ( $n = 72$ ). To identify edges that most strongly correlated with behavior, we  
467 computed Spearman's rank correlations between each unique edge in the FC matrix and the  
468 behavioral score across 72 participants (Figure 2b), yielding 69,617 Spearman's rho values ( $r_s$ ).  
469 Edges positively related to behavior (positive network edges) were identified as those whose  $r_s$   
470 was greater than a pre-defined threshold,  $r_{\text{threshold}}$ , and edges negatively related to behavior  
471 (negative network edges) were defined as those whose  $r_s$  was less than  $-r_{\text{threshold}}$  (Figure 2c).  
472 Next, we computed network strengths (NS) for each participant by summing up values in their  
473 individual FC matrices across all positively and negatively correlated edges (Figure 2d),  
474 resulting in 72 sets of positive NS and negative NS values. Subsequently, we converted the  
475 positive NS, negative NS, and behavioral scores to rank space by ordering them according to  
476 participants' values. Finally, we formulated a multiple linear regression model (Figure 2e) with  
477 positive NS rank and negative NS rank as independent variables and behavioral rank as the  
478 dependent variable i.e., Behavior (rank)  $\sim$  NS<sub>positive</sub> (rank) + NS<sub>negative</sub> (rank).

479 *Model test.* We proceeded to predict the behavioral score (in rank space) of the test  
480 participant (Figure 2f) by applying the training model to his/her FC matrix. Using the same  
481 positive and negatively correlated edges identified from training, positive NS and negative NS  
482 were first computed by summing up values in the FC matrix across the respective edges.  
483 Following this step, positive and negative NS values of the test participant were ranked against



484 the relevant NS values of the training participants, and entered into the multiple linear regression  
485 model to predict a behavioral rank.

486 *Model evaluation.* As part of the leave-one-out cross-validation procedure, the above  
487 training and prediction steps were repeated on all participants ( $N = 73$ ) such that each participant  
488 was left out of training once, resulting in 73 sets of predicted behavioral ranks. To measure the  
489 predictive power of the model, we obtained correlations between the predicted and observed  
490 values, controlling for motion (Rosenberg et al., 2018). To this end, partial Spearman's rank  
491 correlation was computed between predicted and observed behavioral ranks, with the motion  
492 parameters (see section on Motion control) included as covariates. Where FC matrices were  
493 different for training and test, motion parameters from both the resting-state and task-based scans  
494 were included (i.e., ten covariates); where the same FC matrix was used, only motion parameters  
495 from the relevant scan were included (i.e., five covariates). *P*-values for model evaluation were  
496 left uncorrected, as most of the comparisons represented planned replications of previous work,  
497 and the pattern of predictions across tasks was more informative than single model predictions.  
498 For other neuroimaging-based statistical tests, we corrected for multiple comparisons, as detailed  
499 in the respective Results sections (Functional connectivity and Network overlap).

#### 500 **CPM model specification for data from the current study**

501 For each of the eleven behavioral scores (e.g., VABresid, AABresid, VSARTdprime,  
502 etc.), we repeated the CPM procedure to train and test four different types of models. Two model  
503 types (vabCPM model variants) were trained using FC information and behavioral responses  
504 acquired from the main VAB task (i.e., VABFC and VABresid), and used to predict behavioral  
505 performance of novel participants using either their VAB *task* (VABFC; Model type A), or their  
506 *rest* (RSFC; Model type B) FC information. With these models, we sought to identify attentional

507 networks that were predictive of good VAB performance (positive network) and poor VAB  
508 performance (negative network), and then to determine whether these networks generalized to  
509 make similar predictions about other tasks. Two other model types (task-specific model variants)  
510 were trained using task-specific behavioral data and either VAB *task* (VABFC; Model type C) or  
511 *rest* (RSFC; Model type D) information. Behavioral performance was then predicted from the  
512 same type of FC data that was used during training. With these models, we tested whether  
513 predictive networks for each task could be predicted from FC data that was unrelated to that task;  
514 any such predictive networks would be useful for identifying and comparing the edges that are  
515 predictive of performance on a given task.

516 *Model type A (train on VABFC and behavioral data, predict with VABFC data).* For  
517 training, the functional connectivity matrix VABFC and behavioral score VABresid were used to  
518 select edges and form the linear model. For test, the training model was applied to the VABFC  
519 matrix of the left-out participant. For evaluation, the predicted behavior from the leave-one-out  
520 procedure was correlated with the behavioral score from a selected task.

521 *Model type B (train on VABFC and behavioral data, predict with RSFC data).* As in the  
522 previous model, VABFC and VABresid were used for training, but for test, the training model  
523 was applied to the RSFC matrix of the left-out participant. For evaluation, the predicted behavior  
524 was correlated with the behavioral score from a selected task.

525 *Model type C (train and test on VABFC data).* During training, VABFC and the  
526 behavioral score from a selected task were used to form the model. During test, the training  
527 model was applied to VABFC of the left-out participant. For evaluation, the predicted behavior  
528 was correlated with the observed score of the selected task.

529 *Model type D (train and test on RSFC data).* For training, the functional connectivity  
530 matrix RSFC and the behavioral score from a selected task were used to form the model. For  
531 test, the training model was applied to the RSFC of the left-out participant. During evaluation,  
532 the predicted behavior was correlated with the observed score of the selected task.

533 *Controls.* For the primary analyses in the study, we implemented the CPM procedure  
534 using edge selection cutoffs ( $r_{\text{threshold}} = .232, p = .05$ ) previously used in Rosenberg et al. (2018).  
535 As an exploratory control, we also investigated whether our predictions were reasonably stable  
536 across edge selection cutoff values. To do so, we repeated the leave-one-out cross-validation  
537 procedure with  $r_{\text{threshold}}$  ranging from .005 to .5, in steps of .005. Thus, in total, the CPM  
538 procedure was repeated (11 behavior x 4 models x 101 edge selection thresholds) 4,444 times.

539 As  $p$ -values from LOOCV procedures can be biased, we verified the significance of our  
540 models using permutation testing (Shen et al., 2017). A null distribution with 1000 iterations was  
541 generated for each  $r_{\text{threshold}}$ . For each iteration, we randomly shuffled participants' behavioral  
542 scores and repeated the prediction steps above.  $P$ -values (uncorrected for this exploratory  
543 analysis) were computed as the proportion of permutation  $r_s$  with values greater than the  
544 observed  $r_s$ .

#### 545 **Sustained Attention CPM from Rosenberg et al. (2016)**

546 To compare our predictions and networks with another attention-related model, we  
547 applied the Sustained Attention CPM (saCPM) (Rosenberg, Finn, et al., 2016) to our FC data.  
548 The saCPM was constructed using FC data computed with 268 parcellations (Shen, Tokoglu,  
549 Papademetris, & Constable, 2013). As our FC data was computed with 419 parcellations  
550 (Schaefer et al., 2017), we transformed the Shen parcellations to Schaefer parcellations in  
551 MNI152 space (91x109x91, 2mm voxels). For each Shen parcellation, we located the

552 corresponding Schaefer parcellation at a corresponding spatial location, excluding those that  
553 accounted for less than 10% of the voxels in the Shen parcellation. Next, we mapped the saCPM  
554 edges in the following way: if Shen parcellation A mapped to Schaefer parcellations 1, 2, and 3  
555 and Shen parcellation C mapped to Schaefer parcellations 7 and 8, a functional connection  
556 (edge) between Shen parcellations A and C would be mapped to Schaefer edges 1-7, 2-7, 3-7, 1-  
557 8, 2-8, and 3-8. As before, edges that were removed previously due to motion were also removed  
558 in the mapped saCPM edges.

559         We computed network strengths by taking the dot product between the saCPM edges and  
560 our FC matrix (VABFC or RSFC), and entered the result into a linear model: Behavior  $\sim$   
561  $NS_{\text{positive}} + NS_{\text{negative}}$ . Note that these were motion-controlled FCs (69,617 edges), but during  
562 evaluation, we did not implement partial correlation with motion parameters as co-variates,  
563 following Rosenberg, Finn, et al. (2016). As the saCPM model was trained using FC data and  
564 dprime scores acquired during the GradCPT task, predicted scores from the model were also  
565 dprime scores. We evaluated the result of applying the saCPM to our FC data by computing  
566 Spearman's rank correlation between the predicted scores and the scores from each of our  
567 behavioral tasks.

### 568 **Network overlaps and edge locations**

569         *Degree of overlap.* To better understand the relationships across CPMs, we calculated the  
570 percentage of network overlap for model pairs. First, for each model, we identified edges that  
571 were common across all iterations of the leave-one-out procedure; we reasoned that these edges  
572 were most representative of the model. For each pair of models, we expressed the number of  
573 edges in common percentages of the number of edges in each model, and we then computed the

574 average of the two percentages. These percentages were calculated separately for positive-  
575 positive, negative-negative, positive-negative, and negative-positive network overlaps.

576 To statistically assess whether the edges for each pair of models significantly overlapped,  
577 we used the hypergeometric cumulative density function to determine the probability of drawing  
578 up to  $x$  out of  $K$  possible items with  $n$  drawings without replacement, from a population of size  $M$   
579 (Rosenberg, Zhang, et al., 2016). The procedure was implemented with the `hygecdf` function in  
580 (*MATLAB*, 2014), as  $p = 1 - \text{hygecdf}(x, M, K, n)$ , with  $x$  as the number of overlapping edges,  $M$   
581 as the total number of edges,  $K$  as the number of edges from one model, and  $n$  as the number of  
582 edges from the other model. To control for multiple comparisons, FDR correction was applied  
583 across the complete set of tests (Benjamini & Hochberg, 1995).

584 *Anatomical location of networks and overlaps.* To determine the anatomical locations of  
585 network edges and the overlaps between the vabCPM and saCPM networks, we first grouped the  
586 419 parcellations into network groups. The parcellations were matched to 17 network labels  
587 (Yeo et al., 2011), from which they were aggregated into eight cortical groups (Yeo, Tandi, &  
588 Chee, 2015) and a subcortical group. For each pair of network groups (e.g. Visual and Salience /  
589 Ventral Attention), we computed the number of connections (network edges) between them. We  
590 then reported this value as a percentage of the total number of possible connections between that  
591 pair of network groups.

592

593

## Results

594 In the sections below, we first report the behavioral results and the functional  
595 connectivity matrices. We then present the behavioral predictions based on models derived from  
596 the present dataset, followed by the behavioral predictions based on an external model (the

597 saCPM; Rosenberg et al., 2016). After comparing the pattern of predictions, we compare the  
598 degree of overlap across the predictive networks. Finally, we examine the anatomical locations  
599 of the overlaps between the vabCPM and saCPM networks.

## 600 Behavioral performance

601 We found a robust visual attentional blink (VAB) in each session, with substantially  
602 impaired probe detection performance for the shorter lags (1, 2, 3) but not the longer lags (5, 7,  
603 9) (Figure 3). For subsequent individual differences analyses, the VAB deficit was defined as  
604 short-lag performance when controlling for long-lag performance (see Methods), a definition the  
605 results supported. An AAB was also evidenced, though it was both smaller and less robust across  
606 sessions.

607

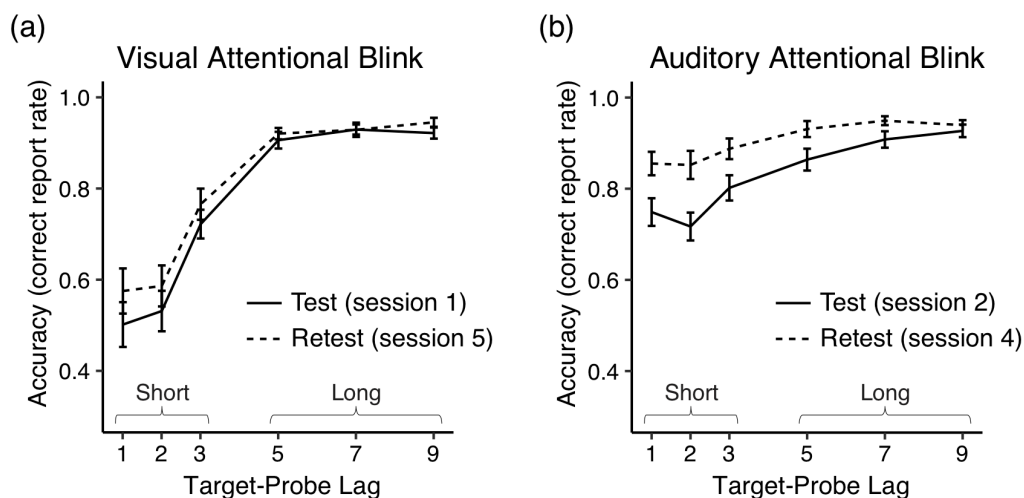

608

609 Figure 3. Accuracy scores (probe hit rates) for the VAB and AAB. Note the substantial  
610 impairment for the short target-probe lags (1, 2, and 3) in each session, especially for the VAB.  
611 Error bars represent standard error of the mean (SEM).

612

613 Test-retest reliability was high for most metrics, and their ranges were reasonable (

614 Table 3). Jarque-Bera tests of normality revealed that several behavioral scores were not  
 615 normally-distributed (see relevant plots in Figure 4). Hence we adopted non-parametric  
 616 approaches in our subsequent analyses and models.

617

618 Table 3. Summary of behavioral data. Test-retest reliability (Spearman correlations across  
 619 sessions) was high for most metrics and significant for all ( $ps < .002$ ). Jarque-Bera tests indicated  
 620 some significant departures from normality. Metrics are presented before re-coding. Metrics that  
 621 were subsequently reversed so that larger values would indicate better task performance are  
 622 marked with an asterisk (\*).  $N = 73$  for all metrics except AABresid ( $N = 71$ ).

| Task domain            | Metric                   | Mean  | SD    | Range           | Reliability<br>( $r_s$ ) | Jarque-<br>Bera ( $p$ ) |
|------------------------|--------------------------|-------|-------|-----------------|--------------------------|-------------------------|
| Attentional            | VABresid                 | 0.003 | 0.213 | [-0.577, 0.356] | 0.75                     | .126                    |
| Blink                  | AABresid                 | 0.001 | 0.118 | [-0.412, 0.274] | 0.38                     | .002                    |
| Sustained<br>Attention | VSARTdprime              | 3.469 | 0.77  | [1.016, 5.256]  | 0.54                     | .077                    |
|                        | ASARTdprime              | 3.187 | 0.795 | [0.364, 5.127]  | 0.62                     | .004                    |
|                        | GradCPTdprime            | 2.844 | 0.655 | [1.607, 4.359]  | 0.65                     | .144                    |
|                        | *ANTerr<br>(% incorrect) | 2.463 | 2.222 | [0, 11.111]     | 0.66                     | .001                    |
| Selective<br>Attention | *ANTrtvar (s)            | 0.147 | 0.035 | [0.088, 0.24]   | 0.65                     | .058                    |
|                        | ANTAert (s)              | 0.074 | 0.022 | [0.02, 0.138]   | 0.42                     | .447                    |
|                        | ANToert (s)              | 0.04  | 0.017 | [0, 0.085]      | 0.36                     | .500                    |
|                        | *ANTcert (s)             | 0.129 | 0.03  | [0.078, 0.207]  | 0.74                     | .100                    |
| Fluid<br>Intelligence  | RavensAcc<br>(% correct) | 82.5  | 15.15 | [22.22, 100]    | -                        | .001                    |

623

624 To examine how behavioral performance was related across the various tasks, we  
625 computed Spearman's rank correlations between each pair of behavioral scores (Figure 4).  
626 Significant correlations were primarily found within a given attentional domain. The three  
627 measures of Sustained Attention (VSARTdprime, ASARTdprime and GradCPTdprime) were  
628 significantly correlated, as were the primary measures of Selective Attention (ANTerr and  
629 ANTrtvar) and some of their component measures. Many of these metrics were significantly  
630 correlated, positively and negatively, across the Sustained and Selective Attention task domains  
631 as well. The negative correlations with the alerting (ANTAert) and orienting (ANToert) metrics  
632 may be due to their reflecting stimulus-driven attentional control, as opposed to the goal-directed  
633 control required for many other metrics. Attentional Blink (VABresid and AABresid) and Fluid  
634 Intelligence (RavensAcc) metrics generally were not significantly correlated with other metrics.  
635



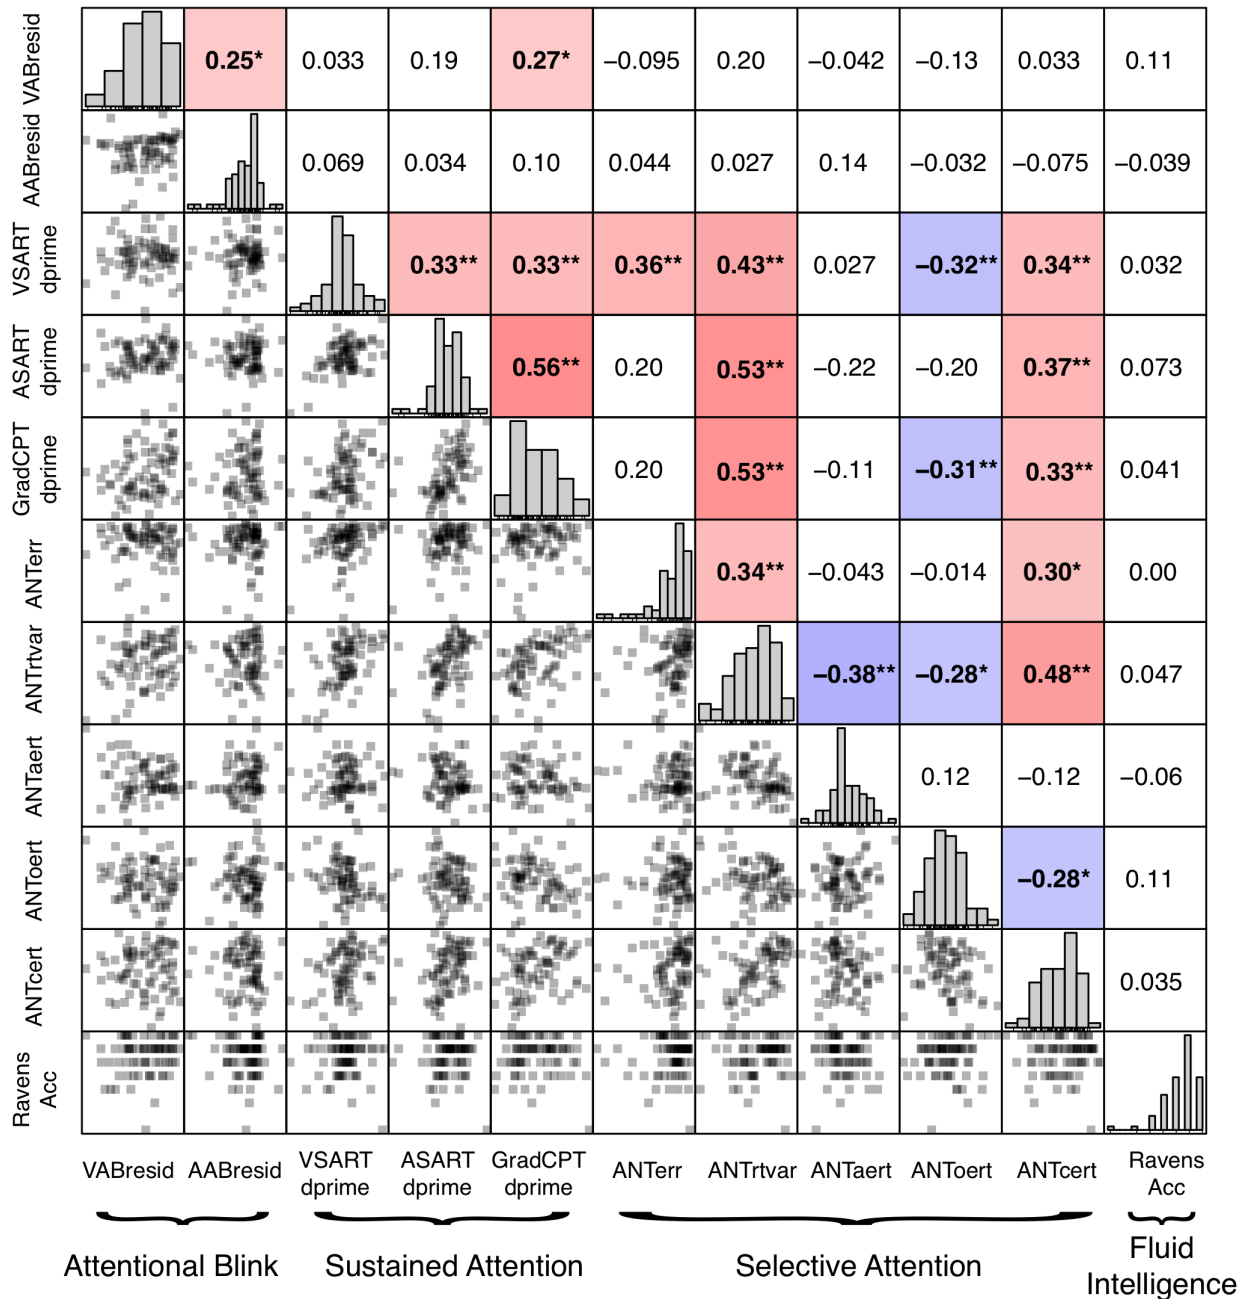

636

637 Figure 4. Behavioral score distributions and correlations. (Above diagonal) Spearman correlation

638 coefficients for pairs of behavioral metrics. Most significant correlations were found within task

639 domains, but some metrics correlated across the Sustained and Selective Attention domains. In

640 contrast, Attentional Blink and Fluid Intelligence metrics largely did not correlate with other

641 metrics. Since the purpose of this analysis was to identify any behavioral relationships that might  
642 explain subsequent CPM results, no correction for multiple comparisons was applied.  $*p < .05$ ,  
643  $**p < .01$ . Red and blue shading indicates positive and negative relationships, respectively.  
644 (Diagonal) Histograms of behavioral data. The behavioral data had been re-coded so that larger  
645 values indicate better task performance for each measure. (Below diagonal) Scatterplots for each  
646 pair of behavioral metrics.

647

### 648 **Functional connectivity matrices**

649 To assess and compare network connectivity during the VAB task and during rest, we  
650 plotted group-averaged functional connectivity (FC) matrices (Figure 5). The 419 parcellations  
651 from the FC matrices were matched to 17 network labels (Yeo et al., 2011), from which they  
652 were aggregated into eight cortical groups (Yeo, Tandi, et al., 2015) and a subcortical group. FC  
653 data from both the VAB task (VABFC; Figure 5a) and resting state (RSFC; Figure 5b) showed  
654 similar connectivity patterns, with largely positive within-network correlations and mixed  
655 directions for between-network correlations. The network correlation patterns were generally  
656 similar to those observed in other data sets (Yeo et al., 2011; Yeo, Tandi, et al., 2015). Using  
657 Network-based statistics to correct for multiple comparisons (Zalesky, Fornito, & Bullmore,  
658 2010), we observed small differences between the two FC matrices, with many connections  
659 linking the Salience/Ventral attention and the Dorsal attention networks (Figure 5c). Such  
660 differences are consistent with the reported neural correlates of the attentional blink, which are in  
661 frontal and parietal areas associated with the ventral and dorsal attention networks (Marois,  
662 Chun, & Gore, 2000; Marois & Ivanoff, 2005).

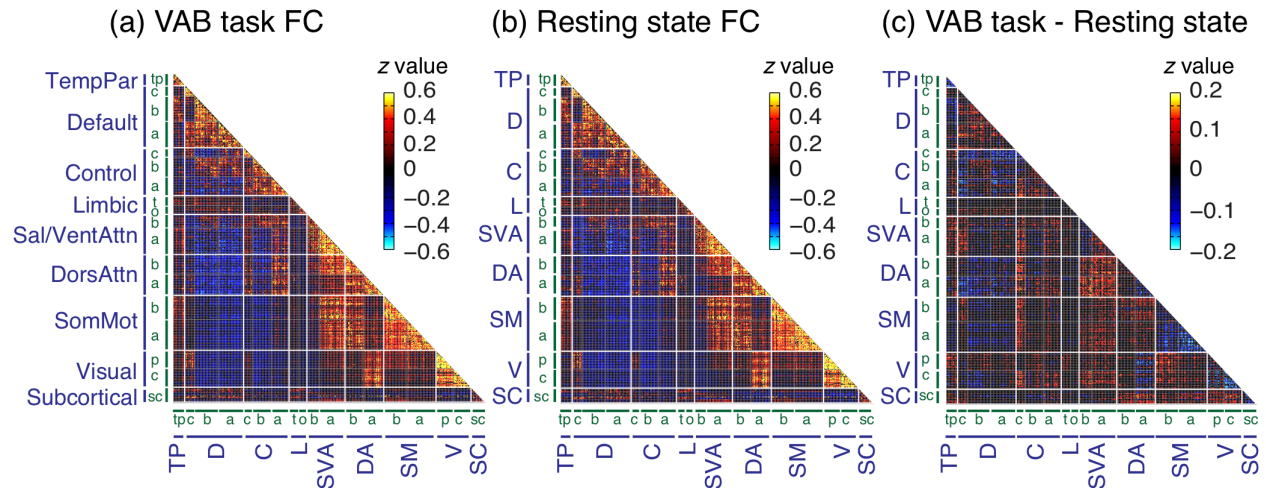

663  
 664 Figure 5. Functional connectivity (FC) matrices. Each edge was Fisher-transformed, and the  
 665 resulting  $z$ -scores were averaged across participants. Edges found to correlate with motion were  
 666 set to zero. (a) VAB task FC matrix (VABFC). (b) Resting-state FC matrix (RSFC). VABFC and  
 667 RSFC patterns were similar to one another and to other data sets (Yeo et al., 2011; Yeo, Tandi, et  
 668 al., 2015). (c) Difference FC matrix (VABFC - RSFC), showing edges that were significant at  $p$   
 669 = .05, corrected for multiple comparisons using network-based statistics. Differences between  
 670 FC matrices were small, though they notably included connections linking the Saliency/Ventral  
 671 attention and the Dorsal attention networks. The 419 parcellations from the FC matrices were  
 672 matched to 17 network labels (Yeo et al., 2011) (green labels), from which they were aggregated  
 673 into eight cortical groups (Yeo, Tandi, et al., 2015) and a subcortical group (blue labels, spelled  
 674 out in full in (a)). Subcortical regions include the brain stem, accumbens area, amygdala,  
 675 caudate, cerebellum, ventral diencephalon, hippocampus, pallidum, putamen, and thalamus. For  
 676 the green labels, letters represent the networks within the corresponding group, e.g., a(Default  
 677 A), b(Default B), c(Default C), tp(TempPar), t(temporal pole in limbic region), o(orbital frontal  
 678 cortex in limbic region), p(peripheral visual area), c(central visual area), and sc(subcortical).

679

680 **Behavioral predictions from CPMs constructed using the present dataset**

681 Models constructed from VAB functional connectivity and behavioral data (vabCPMs)  
682 positively predicted VAB performance from task data (VABFC; Model type A) but not from  
683 resting state data (RSFC; Model type B) (Figure 6a; corresponding values are tabulated in Figure  
684 6-1 in the Extended Data). Task predictions were made in relative performance ranks (Spearman  
685 correlations), so these predictions readily applied to other rank-order behavioral scores. When so  
686 applied, we found that Fluid Intelligence performance could be positively predicted from both  
687 task and rest FC data. Critically, the correlations between predicted and actual performance for  
688 Sustained Attention metrics were *negative*, as were these correlations for Sustained Attention  
689 tasks, albeit less consistently. Such results are counterintuitive, as all behavioral scores were re-  
690 coded so that larger values indicated better performance. Furthermore, one might expect that  
691 individuals whose network data predicted better performance on the VAB and Fluid Intelligence  
692 tasks would perform worse on Sustained Attention and Selective Attention tasks. In reality,  
693 however, VAB performance correlated insignificantly or weakly positively with other task  
694 metrics, whereas Fluid Intelligence performance was not significantly correlated with any other  
695 tasks. We return to this intriguing result in the Discussion.  
696

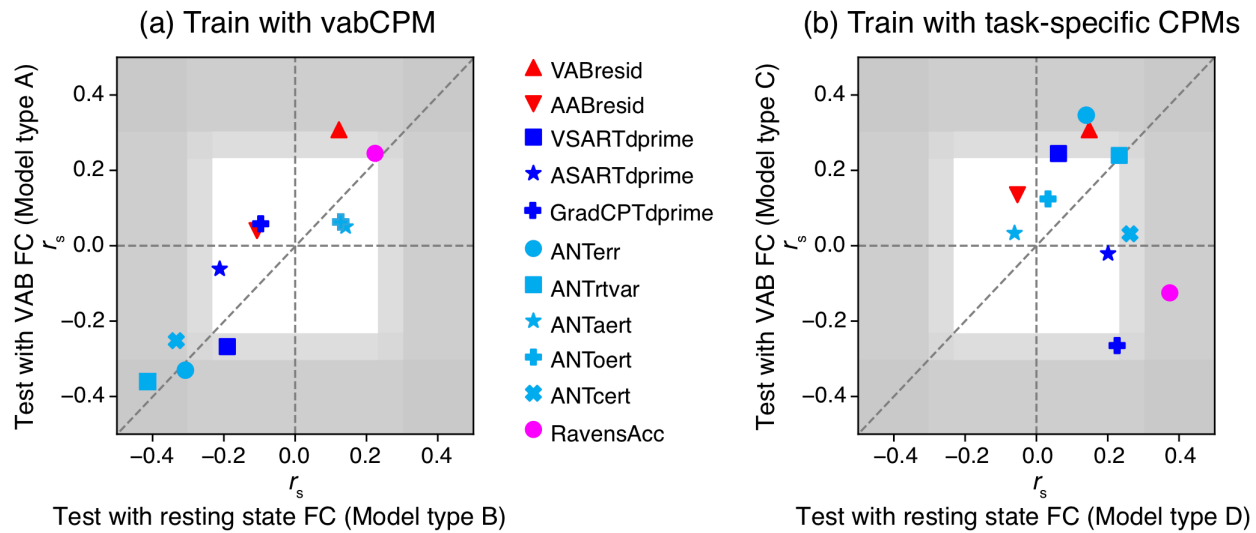

697 Test with resting state FC (Model type B)

698 Figure 6. Behavioral predictions from CPMs. Each point represents a pair of Spearman's rank

699 correlation coefficients ( $r_s$ ) computed between observed and predicted behavioral scores for a

700 given model type. (a) Predictions from vabCPMs, which were trained with VABFC and

701 VABresid. Note the successful positive predictions for the VAB and Fluid Intelligence, but

702 successful *negative* predictions for some Selective and Sustained Attention metrics. (b)

703 Predictions from task-specific models. Many models could successfully predict behavioral

704 performance, though results often varied greatly across the FC source. For both panels, the dark

705 gray region indicates where  $r_s$  values are significant at the  $p = .01$  level, and the lighter gray

706 region indicates where  $r_s$  values are significant at the  $p = .05$  level (uncorrected, with  $d.f. = 71$ ).

707 The  $r_s$  values and corresponding  $p$ -values are tabulated in Figure 6-1 in Extended Data. A

708 standard edge selection threshold ( $r_{\text{threshold}} = .232, p = .05$ ) was used for all models, though

709 results were similar across a wide range of threshold values (Figure 6-2 and Figure 6-3 in

710 Extended Data). Finally, as  $p$ -values from LOOCV procedures can be biased, we verified our

711 results for the VAB using permutation testing; significance from this method and parametric

712 approaches was consistent across edge selection thresholds (Figure 6-4 in in Extended Data).

713

714 Models built from task-specific behavioral data significantly predicted performance for  
715 each of the task metrics predicted from the vabCPMs, although the results were less consistent  
716 between VABFC-based (Model type C) and RSFC-based (Model type D) predictions (Figure 6b;  
717 corresponding values are tabulated in Figure 6-1 in the Extended Data). Although it is possible  
718 that the different predictions reflect different information in the two FC data sources (Figure 3),  
719 it is unclear whether the differences are stable or simply reflect difficulty in building models  
720 from fMRI data for which the behavioral data were collected separately. Indeed, CPMs  
721 constructed from fMRI data collected during task performance and that task's behavioral scores  
722 tend to be more robust (Rosenberg, Finn, et al., 2016; Rosenberg et al., 2018; Yoo et al., 2017).  
723 Regardless, due to the same FC-behavior pair being used during both training and test,  
724 significant negative predictions from the vabCPMs became positive, as expected (e.g.,  
725 VSARTdprime, ANTerr, ANTrtvat and ANTcert).

726 To examine whether model predictions were sensitive to the number of edges selected  
727 during CPM training, we explored how  $r_s$  changes as a function of edge selection thresholds.  $R_s$   
728 values were observed to be reasonably stable across edge selection thresholds, though more  
729 variation was observed in task-specific models (Model types C and D) than in vabCPMs (Model  
730 types A and B) (Figure 6-2 and Figure 6-3 in Extended Data). Additionally, as  $p$ -values from  
731 LOOCV procedures can be biased, we verified our results for the VAB using permutation  
732 testing; significance from this method and parametric approaches was consistent across edge  
733 selection thresholds (Figure 6-4 in in Extended Data). Each of these issues may have contributed  
734 to the unexpected negative predictions for the GradCPTdprime metric, an aspect of the results to  
735 which we return below.

736 **Behavioral predictions from an external CPM (saCPM; Rosenberg et al., 2016).**

737 For external validation of our model predictions, we applied the Sustained Attention  
738 CPM (saCPM) to our data. The saCPM was trained on fMRI and behavioral data from the  
739 GradCPT, a sustained attention task (Rosenberg, Finn, et al., 2016). When applied to our data,  
740 the saCPM predictions were virtually mirror images of our vabCPM predictions (Figure 7).  
741 Specifically, whereas the vabCPM predicted VAB and Fluid Intelligence performance positively  
742 and predicted Sustained Attention and Selective Attention performance negatively, the saCPM  
743 predicted VAB and Fluid Intelligence performance *negatively* and predicted Sustained Attention  
744 and Selective Attention performance *positively*.

745 With these findings, we also replicated the results from Rosenberg et al. (2018).  
746 Specifically, the saCPM was able to predict the error rates (ANTerr), reaction time variability  
747 (ANTrtvar), and conflict (ANTcert) metrics for novel individuals in the ANT task. Conversely,  
748 we failed to replicate the significant predictions for GradCPTdprime in our data, contrary to  
749 expectations. This replication failure is puzzling because the GradCPT behavioral data showed a  
750 reasonable spread of scores and good test-retest reliability (Table 3), and the saCPM and  
751 vabCPM did make significant predictions on other Sustained Attention metrics in our data set.  
752 We are currently exploring our GradCPT task and results further in our laboratory.

753

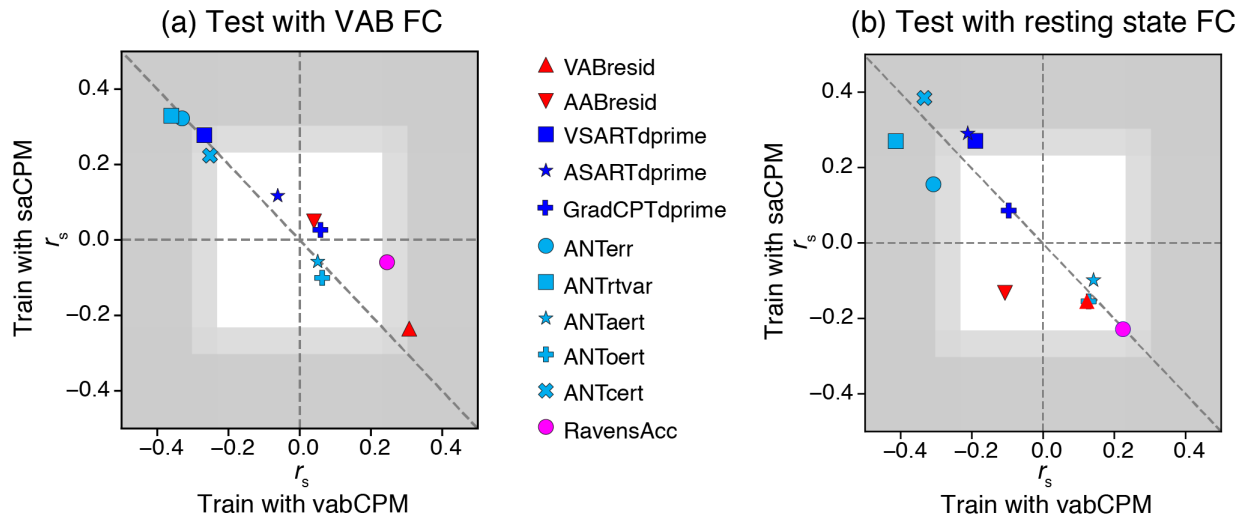

754

755 Figure 7. Comparison of predictions from the vabCPM and saCPM. Each point represents a pair

756 of Spearman's rank correlation coefficients ( $r_s$ ) computed between observed and predicted

757 behavioral scores for a given model type. (a) Predictions from VABFC data. Note the saCPM's

758 successful positive predictions for some Selective and Sustained Attention metrics, with a

759 successful *negative* prediction for the VAB. As noted above, the prediction directions were

760 reversed for the vabCPM; indeed, the prediction points fall close to the diagonal. (b) Predictions

761 from RSFC data. The vabCPM and saCPM predictions went in opposite directions, and were

762 generally similar to the predictions from the VABFC. For both panels, the dark gray region

763 indicates where  $r_s$  values are significant at the  $p = .01$  level, and the lighter gray region indicates

764 where  $r_s$  values are significant at the  $p = .05$  level (uncorrected, with  $d.f. = 71$ ). The edge

765 selection threshold ( $r_{\text{threshold}}$ ) corresponded to  $p = .05$  for all models. The  $r_s$  values and

766 corresponding  $p$ -values for the saCPM are tabulated in Figure 7-1 in the Extended Data. (See

767 Figure 6 for additional vabCPM details.)

768

769 **Degree of overlap between predictive network pairs**



770 To better understand how the underlying functional connectivity networks contributed to  
771 the model predictions, we analyzed the extent to which edges were shared between pairs of  
772 CPMs. For each pair, we calculated overlaps between positive network edges (those that  
773 predicted better behavioral performance for the model's task), between negative network edges,  
774 and across positive and negative network edges (Figure 8). The networks derived from the  
775 vabCPM (VAB network) and saCPM (SA network) did not significantly overlap at similar  
776 network edges (e.g. positive-positive; Figure 8a and 8b). Instead, they significantly overlapped  
777 only at *opposing* network edges, the positive edges from one model and the negative edges from  
778 the other (Figure 8c and 8d).

779 The overlaps between the VAB network and SA network accorded with their overlaps  
780 with networks derived from other task-specific CPMs. VAB network edges tended to overlap  
781 more with the opposing network edges of the Sustained and Selective Attention models (Figure  
782 8c and 8d) as compared to their similar network edges (Figure 8a and 8b). In contrast, SA  
783 network edges overlapped significantly with similar edges from each of the Sustained and  
784 Selective Attention models, but with none of their opposing edges. Finally, although VAB and  
785 Fluid Intelligence networks overlapped significantly only at similar network edges, SA network  
786 edges did not significantly overlap with either similar or opposing Fluid Intelligence network  
787 edges.

788 Taken together, the pattern of edge overlaps accords with the pattern of behavioral  
789 predictions. The VAB and SA networks overlapped at opposing edges, and their predictions  
790 were also negatively related (Figure 7). Predictions for individual metrics also aligned with  
791 model overlaps. In general, when a metric's observed scores positively correlated with scores

792 predicted from the vabCPM or saCPM, that metric's CPM-derived network tended to overlap  
 793 with the VAB or SA network at similar network edges.  
 794

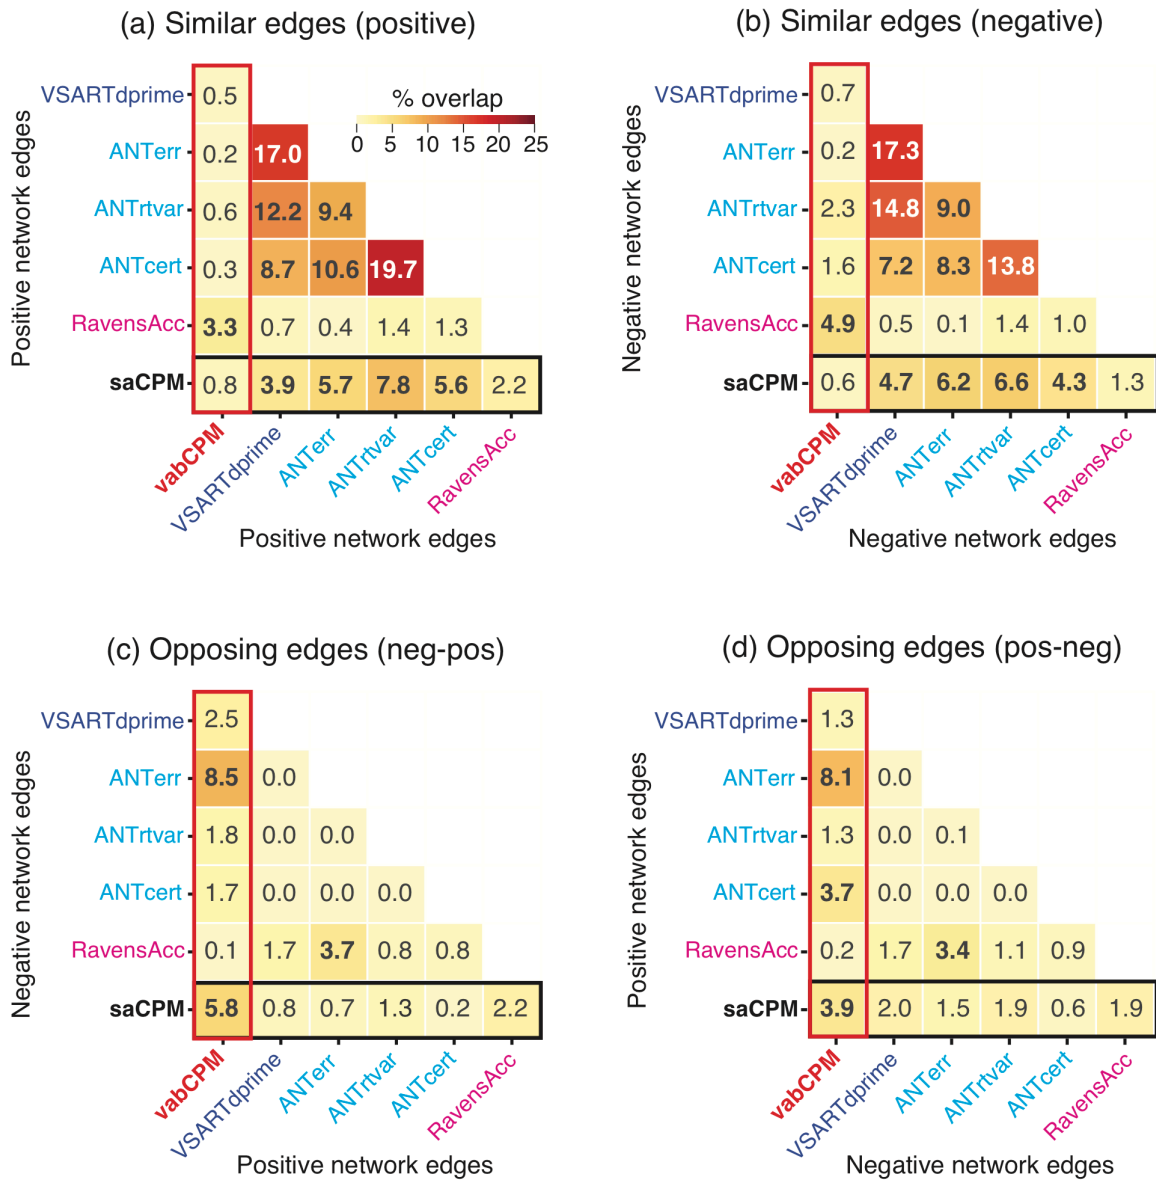

795  
 796 Figure 8. Percentage of edge overlap between networks from selected pairs of CPMs. Each task-  
 797 specific model was based on VABFC data (Model type C). Model pairs with statistically  
 798 significant overlap ( $p < .05$ , FDR corrected) are indicated in bold. Positive network edges  
 799 predicted better behavioral performance for their associated metric, whereas negative network

800 edges predicted worse behavioral performance. Overlap between *similar* network edges, (a)  
801 positive-positive and (b) negative-negative. Sustained Attention (including the saCPM) and  
802 Selective Attention models overlap primarily on similar edges, as do Fluid Intelligence and the  
803 vabCPM. Overlap between *opposing* network edges, (c) negative-positive and (d) positive-  
804 negative. The vabCPM network primarily overlaps with Sustained Attention (including the  
805 saCPM) and Selective Attention on their opposing edges. Only task metrics that were  
806 significantly predicted by vabCPMs using VABFC information are shown. The full set of  
807 overlaps for all CPMs can be found in the Extended Data (Figure 8-1, 8-2, 8-3, and 8-4). Note  
808 that the highest overlap value for any pairwise comparison, including each task metric predicted  
809 from VABFC and RSFC, was 26.5%.

810

811 We also observed significant overlaps between similar network edges from Sustained and  
812 Selective Attention models (Figure 8a and 8b). Similarly, Rosenberg and colleagues observed  
813 substantial overlaps between a high attention (positive) network from the GradCPT task and  
814 networks predicting high accuracy and low RT variability (better performance) in the ANT  
815 (Rosenberg et al., 2018). Taken together, these results suggest that sustained and selective  
816 attention share similar functional networks, at least in part. Such results also justify labels such  
817 as the “successful attention network” (Rosenberg et al., 2018). Importantly, these network  
818 overlaps are consistent with both the CPM predictions and the behavioral relationships (Figure  
819 4). Significant network overlaps involving the VAB network, however, were not accompanied  
820 by significant behavioral relationships. We return to this observation in the Discussion.

821 **Anatomical locations of network edges**

822 To better understand the networks that contribute to the successful behavioral predictions  
823 from the vabCPM and the saCPM, we investigated the anatomy of their underlying network  
824 edges. Briefly, for each pair of network groups (e.g. Visual and Saliency / Ventral Attention), we  
825 expressed the number of shared connections (network edges) as a percentage of the number of  
826 possible connections between that pair (Figure 9). Edges that positively predicted VAB  
827 performance occurred primarily between the Default network and several other networks,  
828 including the Saliency/Ventral attention, Dorsal attention, and Somatomotor networks (Figure  
829 9a). For negative network edges, the most frequent connections occurred between the  
830 Saliency/Ventral attention network and several other networks, including the Dorsal attention,  
831 Somatomotor, and Visual networks (Figure 9b). Note that such connections were also enhanced  
832 in VABFC compared to RSFC (Figure 5c), and that the connections across attention networks  
833 are consistent with the neural correlates of the attentional blink (Marois et al., 2000; Marois &  
834 Ivanoff, 2005). Negative network edges were also frequently found in Somatomotor network  
835 connections to the Dorsal attention network and to itself (within-network connections).

836 The SA network's positive edges primarily included connections that involved the Visual  
837 and Subcortical network groups (Figure 9d). This pattern represents the remapping of the  
838 connections between the cerebellum and the occipital lobe of the "high attention" network  
839 (Rosenberg, Finn, et al., 2016) from the Shen-268 parcellation (Shen et al., 2013) to the  
840 Schaefer-419 one (Schaefer et al., 2017). Negative network edges included within-group  
841 connections in the TempPar and Subcortical networks (Figure 9c), which accord well with the  
842 intra-temporal, intra-cerebellar, and temporo-parietal connections in the "low attention" network  
843 (Rosenberg, Finn, et al., 2016). We observed additional negative edges within the Visual  
844 network and from the TempPar network to various other networks.

(a) VAB, positive network edge locations

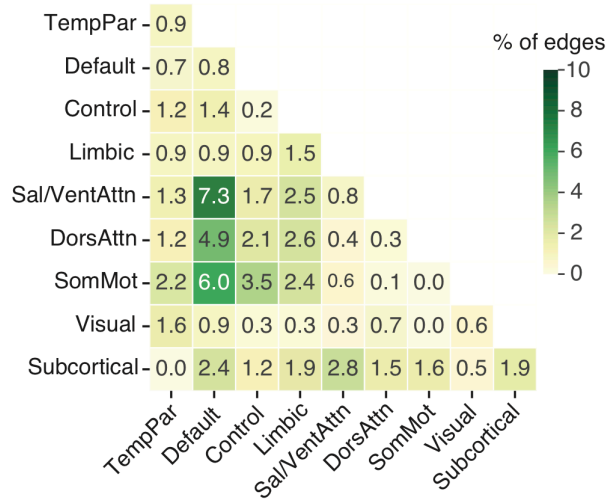

(b) VAB, negative network edge locations

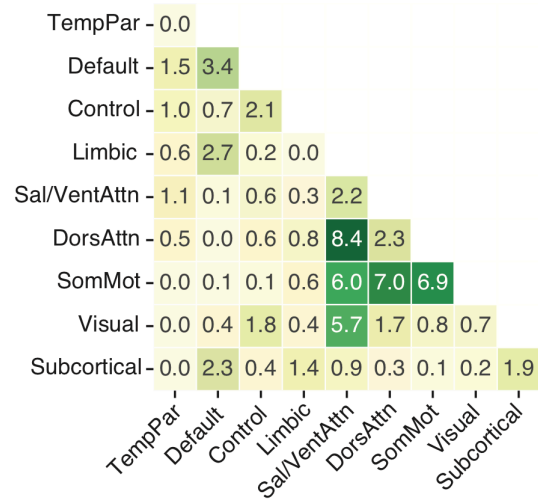

(c) SA, negative network edge locations

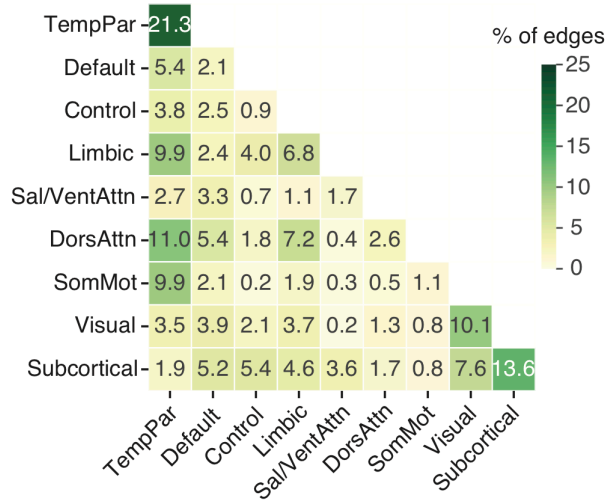

(d) SA, positive network edge locations

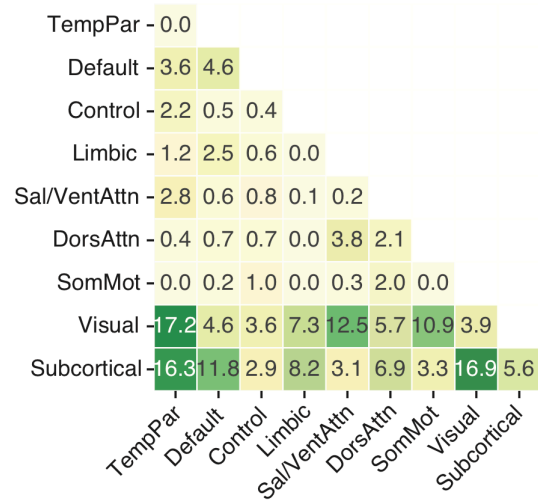

(e) Edge overlap; positive VAB, negative SA

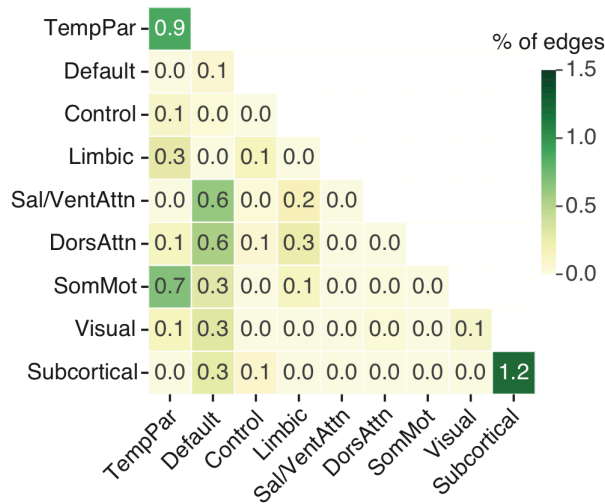

(f) Edge overlap; negative VAB, positive SA

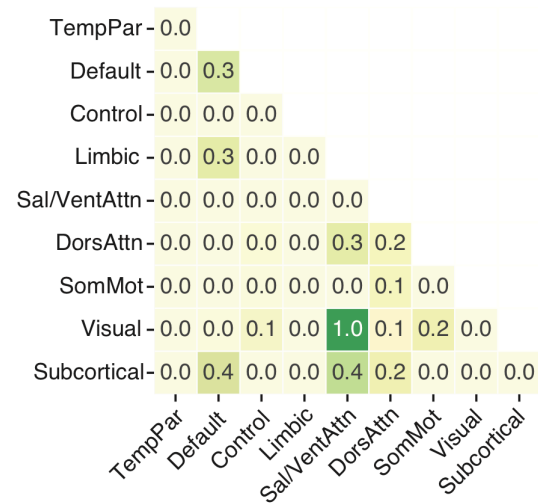

846 Figure 9. Anatomical locations of predictive attentional network edges. Each cell represents the  
847 number of shared connections between a pair of network groups, expressed as a percentage of  
848 the number of possible connections between that pair. For details about network groups, see  
849 Figure 5. (a) Positive and (b) negative VAB network edges. (c) Negative and (d) positive SA  
850 network edges. The panel order has been reversed for easier comparison with the opposing edges  
851 from the VAB network. (e) Positive VAB network edges and negative SA network edges (i.e.  
852 overlaps between (a) and (c)). (f) Negative VAB network edges and positive SA network edges  
853 (i.e. overlaps between (b) and (d)). Overlap percentages were numerically small, but included  
854 key network groups, particularly Default and Salience / Ventral Attention (Sal/VentAttn).  
855

856 Although the VAB and SA networks involved largely dissociable sets of edges, some  
857 critical edges appeared to be shared (Figure 9e and 9f). Note that these overlaps were at opposing  
858 edges (Figure 8). Although overlap percentages were numerically small, they included key  
859 network groups. In particular, multiple identified connections involved the Default,  
860 Salience/Ventral attention, or TempPar networks.

861

## 862 Discussion

### 863 Predictive attentional networks

864 We used Connectome-based Predictive Modeling (CPM), a machine learning-based  
865 technique that associates task performance with functional connectivity measures, to construct a  
866 predictive model of Visual Attentional Blink (VAB) performance. Our model (vabCPM)  
867 successfully predicted VAB performance in novel individuals from fMRI data. The model's  
868 predictions generalized to other task domains, including fluid intelligence (Finn et al., 2015).

869 Critically, vabCPM predictions for many sustained and selective attention task scores correlated  
870 *negatively* with the actual scores. As such, these significant predictions represent both model  
871 generalization and an extension of previous CPM results (Rosenberg, Finn, et al., 2016;  
872 Rosenberg et al., 2018; Yoo et al., 2017), but with new insights into attentional function owing to  
873 the divergent predictions.

874 For external validation of these results, we applied the Sustained Attention CPM  
875 (saCPM) (Rosenberg, Finn, et al., 2016), to our data. Previously, the saCPM successfully  
876 predicted task performance for sustained attention (GradCPT) (Rosenberg, Finn, et al., 2016) and  
877 selective attention (Attention Network Task, ANT) (Rosenberg et al., 2018). Here we broadly  
878 replicated these results: The saCPM successfully predicted sustained and selective attention task  
879 performance when applied to our participants' data. In the sustained attention domain, however,  
880 significant predictions were found only for visual and auditory SART (Sustained Attention to  
881 Response Task) scores, but curiously not for GradCPT scores. In results that mirrored the  
882 vabCPM predictions, the saCPM predictions for VAB scores were negatively correlated with the  
883 observed scores.

884 This pattern of divergent predictions was also reflected in network overlaps. For the  
885 networks derived from the vabCPM and the saCPM, *opposing* network edges (i.e. positive from  
886 one, negative from the other) overlapped significantly, whereas similar network edges did not.  
887 Models constructed from each behavioral task and our fMRI data corroborated these results. As  
888 all behavioral data had been coded such that larger values indicated better performance, these  
889 divergent predictions indicate that “good” or “bad” network function was contingent on the task  
890 and its cognitive underpinnings. Moreover, the tasks were performed over several days,

891 suggesting that the individual differences were stable and trait-like, not due to session-specific  
892 state effects.

### 893 **Implications for Cognitive Mechanisms**

894 Although the observed pattern of CPM predictions may seem counterintuitive, it is  
895 consistent with both empirical evidence and theoretical positions. Foremost, our study's attention  
896 tasks represent different ways of deploying voluntary attention. The VAB task requires rapid  
897 attentional engagement, disengagement, and re-engagement; sustained attention tasks require  
898 engagement over a prolonged period of time; the attention network task (ANT) requires the  
899 direction of attention to relevant spatial information. Skogsberg et al. (2015) proposed that the  
900 VAB and sustained attention tasks lie at opposite ends of a transient-sustained attention  
901 continuum. Rensink suggested that the VAB and ANT involve different core attentional  
902 functions: In the VAB, 'attentional holding' of one visual object leads to the failure to create a  
903 second visual object, whereas in the ANT, 'attentional filtering' selects spatial information  
904 (Rensink, 2013, 2015).

905 Empirical findings support the relative uniqueness of the VAB, while also suggesting that  
906 the ANT and sustained attention are more closely related. In our data, we found a general lack of  
907 behavioral correlations between the VAB and other attention task measures, consistent with  
908 previous studies of individual differences (Dale et al., 2013; Skogsberg et al., 2015). Conversely,  
909 we found moderately strong correlations between sustained attention tasks and the ANT. These  
910 tasks have been found to share similar functional networks (Rosenberg et al., 2018), a result we  
911 also replicated.

912 Nevertheless, the conceptual separation of the VAB from other attention tasks does not  
913 explain the *opposing* pattern of predictions from the same networks (saCPM and vabCPM), and



914 the significant overlaps between their opposing network edges. Two observations provide  
915 important context for this finding. First, the VAB has spawned a variety of theoretical accounts  
916 (Dux & Marois, 2009), and its magnitude is sensitive to numerous disparate manipulations,  
917 ranging from requiring online responses (Jolicoeur, 1998) to concurrently listening to music  
918 (Olivers & Nieuwenhuis, 2005). As such, the VAB may have multiple causes. Second, our VAB  
919 predictions were generally moderate ( $r = .31$  for vabCPM and  $r = .24$  for saCPM; 5-10% of the  
920 variance), far smaller than the observed degree of stable individual differences (test-retest:  $r =$   
921  $.71$ ; 50% of the variance). It is possible that the CPMs capture the variance associated with few,  
922 or even one, of the factors that affect VAB magnitude. If so, what could that factor be?

923         One plausible explanation is that our predictions reflect an individual's propensity to  
924 maintain a more diffuse state of attention. This idea is consistent with the overinvestment  
925 hypothesis, in which the VAB results from too much attention being allocated to the first target;  
926 consequently, reducing attention on the RSVP stream improves performance (Dale & Arnell,  
927 2010, 2015; Olivers & Nieuwenhuis, 2006). Similarly, task-concurrent mind-wandering, such as  
928 listening to music or thinking about a vacation, reduces the VAB deficit (Olivers &  
929 Nieuwenhuis, 2005, 2006). Similar effects are found in studies of disposition: Individuals with a  
930 greater propensity for mind-wandering tend to perform better in the VAB task (Thomson et al.,  
931 2015). Furthermore, mind-wandering has been linked to higher fluid intelligence and better  
932 problem-solving abilities (Baird, Smallwood, & Schooler, 2011; Godwin et al., 2017; Unsworth  
933 & McMillan, 2014), consistent with our CPM findings.

934         Diffuse attentional states, however, are associated with lower performance on tasks  
935 requiring more focused cognition. For example, in sustained attention tasks, individuals more  
936 prone to lapses in attention perform more poorly on the SART (Manly, 1999; Robertson et al.,

937 1997; Smilek et al., 2010). Within individuals, distractive thoughts are associated with lower  
938 SART accuracy, prolonged and more variable RTs, and poorer response inhibition (Kam &  
939 Handy, 2014; Leszczynski et al., 2017; Stawarczyk, Majerus, Maj, Van der Linden, &  
940 D'Argembeau, 2011). In selective attention tasks, individuals more prone to mind-wandering  
941 performed worse on the ANT task (Gonçalves et al., 2017), and showed impaired exogenous  
942 orienting of attention (Hu et al., 2012).

943 Both mind-wandering states and traits are also reflected in patterns of brain activity.  
944 Activity in the Default network and frontoparietal control regions increases during mind-  
945 wandering (Fox, Spreng, Ellamil, Andrews-Hanna, & Christoff, 2015). Similarly, individuals  
946 more prone to mind-wander had increased connectivity both within the Default network and  
947 between the Default network and frontoparietal control regions (Godwin et al., 2017). Such  
948 results are partially consistent with our findings. Edges between the Default and attentional  
949 networks (not the Control network) were related to positive VAB network edges and negative  
950 SA network edges.

951 On the weight of the available evidence, we propose that our vabCPM reflects  
952 individuals' propensity towards diffuse attentional deployment. That propensity could indicate  
953 an individual's ability to diffusely attend, their tendency to be in that state or mode, or both. We  
954 also suggest that other CPMs, including the saCPM, could reflect the complementary propensity  
955 towards more focused attentional deployment.

### 956 **Predictions from “Resting State”**

957 Neuroimaging studies using ‘resting state’ data, in which subjects are scanned while not  
958 engaged in any particular task, have become increasingly popular. Initially used to identify  
959 functional architecture (Biswal, Yetkin, Haughton, & Hyde, 1995; Schaefer et al., 2017; Yeo et

960 al., 2011), resting state data have recently been used to test whether functional architecture  
961 persists even when an individual is not engaged in a task that requires a given neurocognitive  
962 network (Finn et al., 2015; Jangraw et al., 2018; Lin et al., 2018; Rosenberg, Finn, et al., 2016;  
963 Yoo et al., 2017). Resting state studies also have many logistical advantages, including relatively  
964 easy standardization across multiple test sites and the potential for numerous applications from a  
965 single data set. In the current study, resting state CPMs (Model type D) replicated previous  
966 studies by successfully predicting sustained attention (Yoo et al., 2017), selective attention (Yoo  
967 et al., 2017) and fluid intelligence (Finn et al., 2015) task performance. We also replicated the  
968 result that models trained with *task-concurrent* FC data generally predict task performance better  
969 than models trained from resting state data (Yoo et al., 2017). Finally, when applying our trained  
970 vabCPM model to novel participants, predictions from task FC data were superior to predictions  
971 from resting-state FC data (Finn et al., 2017; Greene, Gao, Scheinost, & Constable, 2018;  
972 Rosenberg, Finn, et al., 2016; Rosenberg et al., 2018). This result might be due to amplification  
973 of behaviorally relevant individual differences in network patterns while performing a task  
974 (Greene et al., 2018).

## 975 **Methodological Considerations**

976 Although we followed the guidelines in Shen et al. (2017) when developing our CPMs,  
977 there are two notable methodological differences. First, previous studies used the volumetric  
978 Shen-268 parcellation (Shen et al., 2013), but we used the surface-based Schaefer-419  
979 parcellation (Schaefer et al., 2017). Second, previous studies have constructed linear models for  
980 associating network strength and behavioral scores, with predictions assessed using Spearman  
981 correlations (Fountain-Zaragoza et al., 2019; Lin et al., 2018; Rosenberg, Finn, et al., 2016;  
982 Rosenberg et al., 2018). We instead formed linear models from the ranks directly. Despite these

983 differences, we still observed prediction patterns that were largely consistent and comparable to  
984 previous studies, providing evidence that CPMs are reasonably robust across such variations.  
985

986  
987  
988  
989  
990  
991  
992  
993  
994  
995  
996  
997  
998  
999  
1000  
1001  
1002  
1003  
1004  
1005  
1006  
1007

## References

- Adolfsson, S., Sorensen, L., & Lundervold, A. J. (2008). The attention network test: A characteristic pattern of deficits in children with ADHD. *Behavioral and Brain Functions, 4*(1), 9. <https://doi.org/10.1186/1744-9081-4-9>
- Asplund, C. L., Todd, J. J., Snyder, A. P., & Marois, R. (2010). A central role for the lateral prefrontal cortex in goal-directed and stimulus-driven attention. *Nature Neuroscience, 13*(4), 507–512. <https://doi.org/10.1038/nn.2509>
- Baird, B., Smallwood, J., & Schooler, J. W. (2011). Back to the future: Autobiographical planning and the functionality of mind-wandering. *Consciousness and Cognition, 20*(4), 1604–1611. <https://doi.org/10.1016/j.concog.2011.08.007>
- Benjamini, Y., & Hochberg, Y. (1995). Controlling the False Discovery Rate: A Practical and Powerful Approach to Multiple Testing. *Journal of the Royal Statistical Society. Series B (Methodological), 57*(1), 289–300.
- Bilker, W. B., Hansen, J. A., Brensinger, C. M., Richard, J., Gur, R. E., & Gur, R. C. (2012). Development of Abbreviated Nine-Item Forms of the Raven’s Standard Progressive Matrices Test. *Assessment, 19*(3), 354–369. <https://doi.org/10.1177/1073191112446655>
- Biswal, B., Yetkin, F. Z., Haughton, V. M., & Hyde, J. S. (1995). Functional connectivity in the motor cortex of resting human brain using echo-planar MRI. *Magnetic Resonance in Medicine, 34*(4), 537–541.
- Chun, M. M., Golomb, J. D., & Turk-Browne, N. B. (2011). A Taxonomy of External and Internal Attention. *Annual Review of Psychology, 62*(1), 73–101. <https://doi.org/10.1146/annurev.psych.093008.100427>

- 1008 Chun, M. M., & Potter, M. C. (1995). A two-stage model for multiple target detection in rapid  
1009 serial visual presentation. *Journal of Experimental Psychology. Human Perception and*  
1010 *Performance*, 21(1), 109–127.
- 1011 Corbetta, M., & Shulman, G. L. (2002). Control of goal-directed and stimulus-driven attention in  
1012 the brain. *Nature Reviews Neuroscience*, 3(3), 201–215. <https://doi.org/10.1038/nrn755>
- 1013 Dale, G., & Arnell, K. M. (2010). Individual differences in dispositional focus of attention  
1014 predict attentional blink magnitude. *Attention, Perception, & Psychophysics*, 72(3), 602–  
1015 606. <https://doi.org/10.3758/APP.72.3.602>
- 1016 Dale, G., & Arnell, K. M. (2015). Multiple measures of dispositional global/local bias predict  
1017 attentional blink magnitude. *Psychological Research*, 79(4), 534–547.  
1018 <https://doi.org/10.1007/s00426-014-0591-3>
- 1019 Dale, G., Dux, P. E., & Arnell, K. M. (2013). Individual differences within and across attentional  
1020 blink tasks revisited. *Attention, Perception, & Psychophysics*, 75(3), 456–467.  
1021 <https://doi.org/10.3758/s13414-012-0415-8>
- 1022 Desimone, R., & Duncan, J. (1995). Neural Mechanisms of Selective Visual Attention. *Annual*  
1023 *Review of Neuroscience*, 18(1), 193–222.  
1024 <https://doi.org/10.1146/annurev.ne.18.030195.001205>
- 1025 Di Lollo, V., Kawahara, J., Shahab Ghorashi, S. M., & Enns, J. T. (2005). The attentional blink:  
1026 Resource depletion or temporary loss of control? *Psychological Research*, 69(3), 191–  
1027 200. <https://doi.org/10.1007/s00426-004-0173-x>
- 1028 Duncan, J. (2010). The multiple-demand (MD) system of the primate brain: Mental programs for  
1029 intelligent behaviour. *Trends in Cognitive Sciences*, 14(4), 172–179.  
1030 <https://doi.org/10.1016/j.tics.2010.01.004>

- 1031 Dux, P. E., & Marois, R. (2009). The attentional blink: A review of data and theory. *Attention,*  
1032 *Perception & Psychophysics, 71*(8), 1683–1700. <https://doi.org/10.3758/APP.71.8.1683>
- 1033 Egeth, H. E., & Yantis, S. (1997). Visual attention: Control, representation, and time course.  
1034 *Annual Review of Psychology, 48*(1), 269–297.
- 1035 Esterman, M., Noonan, S. K., Rosenberg, M., & DeGutis, J. (2013). In the Zone or Zoning Out?  
1036 Tracking Behavioral and Neural Fluctuations During Sustained Attention. *Cerebral*  
1037 *Cortex, 23*(11), 2712–2723. <https://doi.org/10.1093/cercor/bhs261>
- 1038 Fan, J., McCandliss, B. D., Sommer, T., Raz, A., & Posner, M. I. (2002). Testing the Efficiency  
1039 and Independence of Attentional Networks. *Journal of Cognitive Neuroscience, 14*(3),  
1040 340–347. <https://doi.org/10.1162/089892902317361886>
- 1041 Feinberg, D. A., Moeller, S., Smith, S. M., Auerbach, E., Ramanna, S., Glasser, M. F., ...  
1042 Yacoub, E. (2010). Multiplexed Echo Planar Imaging for Sub-Second Whole Brain  
1043 fMRI and Fast Diffusion Imaging. *PLoS ONE, 5*(12), e15710.  
1044 <https://doi.org/10.1371/journal.pone.0015710>
- 1045 Finn, E. S., Scheinost, D., Finn, D. M., Shen, X., Papademetris, X., & Constable, R. T. (2017).  
1046 Can brain state be manipulated to emphasize individual differences in functional  
1047 connectivity? *NeuroImage, 160*, 140–151.  
1048 <https://doi.org/10.1016/j.neuroimage.2017.03.064>
- 1049 Finn, E. S., Shen, X., Scheinost, D., Rosenberg, M. D., Huang, J., Chun, M. M., ... Constable, R.  
1050 T. (2015). Functional connectome fingerprinting: Identifying individuals using patterns  
1051 of brain connectivity. *Nature Neuroscience, 18*(11), 1664–1671.  
1052 <https://doi.org/10.1038/nn.4135>

- 1053 Fong, A. H. C., Yoo, K., Rosenberg, M. D., Zhang, S., Li, C.-S. R., Scheinost, D., ... Chun, M.  
1054 M. (2019). Dynamic functional connectivity during task performance and rest predicts  
1055 individual differences in attention across studies. *NeuroImage*, *188*, 14–25.  
1056 <https://doi.org/10.1016/j.neuroimage.2018.11.057>
- 1057 Fountain-Zaragoza, S., Samimy, S., Rosenberg, M. D., & Prakash, R. S. (2019). Connectome-  
1058 based models predict attentional control in aging adults. *NeuroImage*, *186*, 1–13.  
1059 <https://doi.org/10.1016/j.neuroimage.2018.10.074>
- 1060 Fox, K. C. R., Spreng, R. N., Ellamil, M., Andrews-Hanna, J. R., & Christoff, K. (2015). The  
1061 wandering brain: Meta-analysis of functional neuroimaging studies of mind-wandering  
1062 and related spontaneous thought processes. *NeuroImage*, *111*, 611–621.  
1063 <https://doi.org/10.1016/j.neuroimage.2015.02.039>
- 1064 Godwin, C. A., Hunter, M. A., Bezdek, M. A., Lieberman, G., Elkin-Frankston, S., Romero, V.  
1065 L., ... Schumacher, E. H. (2017). Functional connectivity within and between intrinsic  
1066 brain networks correlates with trait mind wandering. *Neuropsychologia*, *103*, 140–153.  
1067 <https://doi.org/10.1016/j.neuropsychologia.2017.07.006>
- 1068 Gonçalves, Ó. F., Rêgo, G., Oliveira-Silva, P., Leite, J., Carvalho, S., Fregni, F., ... Boggio, P. S.  
1069 (2017). Mind wandering and the attention network system. *Acta Psychologica*, *172*, 49–  
1070 54. <https://doi.org/10.1016/j.actpsy.2016.11.008>
- 1071 Greene, A. S., Gao, S., Scheinost, D., & Constable, R. T. (2018). Task-induced brain state  
1072 manipulation improves prediction of individual traits. *Nature Communications*, *9*(1).  
1073 <https://doi.org/10.1038/s41467-018-04920-3>



- 1074 Hu, N., He, S., & Xu, B. (2012). Different efficiencies of attentional orienting in different  
1075 wandering minds. *Consciousness and Cognition*, *21*(1), 139–148.  
1076 <https://doi.org/10.1016/j.concog.2011.12.007>
- 1077 Jangraw, D. C., Gonzalez-Castillo, J., Handwerker, D. A., Ghane, M., Rosenberg, M. D.,  
1078 Panwar, P., & Bandettini, P. A. (2018). A functional connectivity-based neuromarker of  
1079 sustained attention generalizes to predict recall in a reading task. *NeuroImage*, *166*, 99–  
1080 109. <https://doi.org/10.1016/j.neuroimage.2017.10.019>
- 1081 Jolicoeur, P. (1998). Modulation of the attentional blink by on-line response selection: Evidence  
1082 from speeded and unspeeded Task1 decisions. *Memory & Cognition*, *26*(5), 1014–1032.  
1083 <https://doi.org/10.3758/BF03201180>
- 1084 Kam, J. W. Y., & Handy, T. C. (2014). Differential recruitment of executive resources during  
1085 mind wandering. *Consciousness and Cognition*, *26*, 51–63.  
1086 <https://doi.org/10.1016/j.concog.2014.03.002>
- 1087 Kong, R., Li, J., Orban, C., Sabuncu, M. R., Liu, H., Schaefer, A., ... Yeo, B. T. T. (2019).  
1088 Spatial Topography of Individual-Specific Cortical Networks Predicts Human Cognition,  
1089 Personality, and Emotion. *Cerebral Cortex*, *29*(6), 2533–2551.  
1090 <https://doi.org/10.1093/cercor/bhy123>
- 1091 Leszczynski, M., Chaieb, L., Reber, T. P., Derner, M., Axmacher, N., & Fell, J. (2017). Mind  
1092 wandering simultaneously prolongs reactions and promotes creative incubation. *Scientific*  
1093 *Reports*, *7*(1). <https://doi.org/10.1038/s41598-017-10616-3>
- 1094 Lin, Q., Rosenberg, M. D., Yoo, K., Hsu, T. W., O'Connell, T. P., & Chun, M. M. (2018).  
1095 Resting-State Functional Connectivity Predicts Cognitive Impairment Related to

- 1096 Alzheimer's Disease. *Frontiers in Aging Neuroscience*, *10*.
- 1097 <https://doi.org/10.3389/fnagi.2018.00094>
- 1098 Lundervold, A. J., Adolfsdottir, S., Halleland, H., Halmøy, A., Plessen, K., & Haavik, J. (2011).  
1099 Attention Network Test in adults with ADHD - the impact of affective fluctuations.  
1100 *Behavioral and Brain Functions*, *7*(1), 27. <https://doi.org/10.1186/1744-9081-7-27>
- 1101 MacLean, M. H., & Arnell, K. M. (2012). A conceptual and methodological framework for  
1102 measuring and modulating the attentional blink. *Attention, Perception, & Psychophysics*,  
1103 *74*(6), 1080–1097. <https://doi.org/10.3758/s13414-012-0338-4>
- 1104 Manly, T. (1999). The absent mind: Further investigations of sustained attention to response.  
1105 *Neuropsychologia*, *37*(6), 661–670. [https://doi.org/10.1016/S0028-3932\(98\)00127-4](https://doi.org/10.1016/S0028-3932(98)00127-4)
- 1106 Marois, R., Chun, M. M., & Gore, J. C. (2000). Neural correlates of the attentional blink.  
1107 *Neuron*, *28*(1), 299–308.
- 1108 Marois, R., & Ivanoff, J. (2005). Capacity limits of information processing in the brain. *Trends*  
1109 *in Cognitive Sciences*, *9*(6), 296–305. <https://doi.org/10.1016/j.tics.2005.04.010>
- 1110 *MATLAB*. (2014). Natick, MA: The MathWorks, Inc.
- 1111 Moeller, S., Yacoub, E., Olman, C. A., Auerbach, E., Strupp, J., Harel, N., & Uğurbil, K. (2010).  
1112 Multiband multislice GE-EPI at 7 tesla, with 16-fold acceleration using partial parallel  
1113 imaging with application to high spatial and temporal whole-brain fMRI. *Magnetic*  
1114 *Resonance in Medicine*, *63*(5), 1144–1153. <https://doi.org/10.1002/mrm.22361>
- 1115 Olivers, C. N. L., & Nieuwenhuis, S. (2005). The Beneficial Effect of Concurrent Task-  
1116 Irrelevant Mental Activity on Temporal Attention. *Psychological Science*, *16*(4), 265–  
1117 269. <https://doi.org/10.1111/j.0956-7976.2005.01526.x>

- 1118 Olivers, C. N. L., & Nieuwenhuis, S. (2006). The beneficial effects of additional task load,  
1119 positive affect, and instruction on the attentional blink. *Journal of Experimental*  
1120 *Psychology: Human Perception and Performance*, 32(2), 364–379.  
1121 <https://doi.org/10.1037/0096-1523.32.2.364>
- 1122 Peirce, J. W. (2007). PsychoPy—Psychophysics software in Python. *Journal of Neuroscience*  
1123 *Methods*, 162(1–2), 8–13. <https://doi.org/10.1016/j.jneumeth.2006.11.017>
- 1124 Posner, M. I., & Petersen, S. E. (1990). The Attention System of the Human Brain. *Annual*  
1125 *Review of Neuroscience*, 13(1), 25–42.  
1126 <https://doi.org/10.1146/annurev.ne.13.030190.000325>
- 1127 Power, J. D., Barnes, K. A., Snyder, A. Z., Schlaggar, B. L., & Petersen, S. E. (2012). Spurious  
1128 but systematic correlations in functional connectivity MRI networks arise from subject  
1129 motion. *NeuroImage*, 59(3), 2142–2154.  
1130 <https://doi.org/10.1016/j.neuroimage.2011.10.018>
- 1131 Power, J. D., Mitra, A., Laumann, T. O., Snyder, A. Z., Schlaggar, B. L., & Petersen, S. E.  
1132 (2014). Methods to detect, characterize, and remove motion artifact in resting state fMRI.  
1133 *NeuroImage*, 84, 320–341. <https://doi.org/10.1016/j.neuroimage.2013.08.048>
- 1134 Raven, J., Raven, J. C., & Court, J. H. (1998). *Manual for Raven's progressive matrices and*  
1135 *vocabulary scales*. Oxford: Oxford Psychologists.
- 1136 Raymond, J. E., Shapiro, K. L., & Arnell, K. M. (1992). Temporary suppression of visual  
1137 processing in an RSVP task: An attentional blink? *Journal of Experimental Psychology*.  
1138 *Human Perception and Performance*, 18(3), 849–860.
- 1139 Rensink, R. A. (2013). Perception and Attention. In D. Reisberg (Ed.), *Oxford Handbook of*  
1140 *Cognitive Psychology* (pp. 97–116). New York: Oxford University Press.

- 1141 Rensink, R. A. (2015). A Function-Centered Taxonomy of Visual Attention. In P. Coates & S.  
1142 Coleman (Eds.), *Phenomenal Qualities: Sense, Perception, and Consciousness*. (pp. 347–  
1143 375). Oxford: Oxford University Press.
- 1144 Robertson, I. H., Manly, T., Andrade, J., Baddeley, B. T., & Yiend, J. (1997). ‘Oops!’:  
1145 Performance correlates of everyday attentional failures in traumatic brain injured and  
1146 normal subjects. *Neuropsychologia*, *35*(6), 747–758. [https://doi.org/10.1016/S0028-](https://doi.org/10.1016/S0028-3932(97)00015-8)  
1147 [3932\(97\)00015-8](https://doi.org/10.1016/S0028-3932(97)00015-8)
- 1148 Rosenberg, M. D., Finn, E. S., Scheinost, D., Papademetris, X., Shen, X., Constable, R. T., &  
1149 Chun, M. M. (2016). A neuromarker of sustained attention from whole-brain functional  
1150 connectivity. *Nature Neuroscience*, *19*(1), 165–171. <https://doi.org/10.1038/nn.4179>
- 1151 Rosenberg, M. D., Hsu, W.-T., Scheinost, D., Constable, T. R., & Chun, M. M. (2018).  
1152 Connectome-based Models Predict Separable Components of Attention in Novel  
1153 Individuals. *Journal of Cognitive Neuroscience*, *30*(2), 160–173.  
1154 [https://doi.org/10.1162/jocn\\_a\\_01197](https://doi.org/10.1162/jocn_a_01197)
- 1155 Rosenberg, M. D., Noonan, S., DeGutis, J., & Esterman, M. (2013). Sustaining visual attention  
1156 in the face of distraction: A novel gradual-onset continuous performance task. *Attention,*  
1157 *Perception, & Psychophysics*, *75*(3), 426–439. [https://doi.org/10.3758/s13414-012-0413-](https://doi.org/10.3758/s13414-012-0413-x)  
1158 [x](https://doi.org/10.3758/s13414-012-0413-x)
- 1159 Rosenberg, M. D., Zhang, S., Hsu, W.-T., Scheinost, D., Finn, E. S., Shen, X., ... Chun, M. M.  
1160 (2016). Methylphenidate Modulates Functional Network Connectivity to Enhance  
1161 Attention. *Journal of Neuroscience*, *36*(37), 9547–9557.  
1162 <https://doi.org/10.1523/JNEUROSCI.1746-16.2016>

- 1163 Schaefer, A., Kong, R., Gordon, E. M., Laumann, T. O., Zuo, X.-N., Holmes, A. J., ... Yeo, B.  
1164 T. T. (2017). Local-Global Parcellation of the Human Cerebral Cortex from Intrinsic  
1165 Functional Connectivity MRI. *Cerebral Cortex*, 1–20.  
1166 <https://doi.org/10.1093/cercor/bhx179>
- 1167 Seli, P., Cheyne, J. A., Barton, K. R., & Smilek, D. (2012). Consistency of sustained attention  
1168 across modalities: Comparing visual and auditory versions of the SART. *Canadian*  
1169 *Journal of Experimental Psychology/Revue Canadienne de Psychologie Expérimentale*,  
1170 66(1), 44–50. <https://doi.org/10.1037/a0025111>
- 1171 Shen, X., Finn, E. S., Scheinost, D., Rosenberg, M. D., Chun, M. M., Papademetris, X., &  
1172 Constable, R. T. (2017). Using connectome-based predictive modeling to predict  
1173 individual behavior from brain connectivity. *Nature Protocols*, 12(3), 506–518.  
1174 <https://doi.org/10.1038/nprot.2016.178>
- 1175 Shen, X., Tokoglu, F., Papademetris, X., & Constable, R. T. (2013). Groupwise whole-brain  
1176 parcellation from resting-state fMRI data for network node identification. *NeuroImage*,  
1177 82, 403–415. <https://doi.org/10.1016/j.neuroimage.2013.05.081>
- 1178 Skogsberg, K., Grabowecky, M., Wilt, J., Revelle, W., Iordanescu, L., & Suzuki, S. (2015). A  
1179 relational structure of voluntary visual-attention abilities. *Journal of Experimental*  
1180 *Psychology: Human Perception and Performance*, 41(3), 761–789.  
1181 <https://doi.org/10.1037/a0039000>
- 1182 Smilek, D., Carriere, J. S. A., & Cheyne, J. A. (2010). Failures of sustained attention in life, lab,  
1183 and brain: Ecological validity of the SART. *Neuropsychologia*, 48(9), 2564–2570.  
1184 <https://doi.org/10.1016/j.neuropsychologia.2010.05.002>

- 1185 Stawarczyk, D., Majerus, S., Maj, M., Van der Linden, M., & D'Argembeau, A. (2011). Mind-  
1186 wandering: Phenomenology and function as assessed with a novel experience sampling  
1187 method. *Acta Psychologica*, *136*(3), 370–381.  
1188 <https://doi.org/10.1016/j.actpsy.2011.01.002>
- 1189 Tamber-Rosenau, B. J., Dux, P. E., Tombu, M. N., Asplund, C. L., & Marois, R. (2013). Amodal  
1190 Processing in Human Prefrontal Cortex. *Journal of Neuroscience*, *33*(28), 11573–11587.  
1191 <https://doi.org/10.1523/JNEUROSCI.4601-12.2013>
- 1192 Thomson, D. R., Ralph, B. C. W., Besner, D., & Smilek, D. (2015). The more your mind  
1193 wanders, the smaller your attentional blink: An individual differences study. *Quarterly*  
1194 *Journal of Experimental Psychology*, *68*(1), 181–191.  
1195 <https://doi.org/10.1080/17470218.2014.940985>
- 1196 Unsworth, N., & McMillan, B. D. (2014). Similarities and differences between mind-wandering  
1197 and external distraction: A latent variable analysis of lapses of attention and their relation  
1198 to cognitive abilities. *Acta Psychologica*, *150*, 14–25.  
1199 <https://doi.org/10.1016/j.actpsy.2014.04.001>
- 1200 Van Dijk, K. R. A., Hedden, T., Venkataraman, A., Evans, K. C., Lazar, S. W., & Buckner, R. L.  
1201 (2010). Intrinsic functional connectivity as a tool for human connectomics: Theory,  
1202 properties, and optimization. *Journal of Neurophysiology*, *103*(1), 297–321.  
1203 <https://doi.org/10.1152/jn.00783.2009>
- 1204 Webb, G. I., Sammut, C., Perlich, C., Horváth, T., Wrobel, S., Korb, K. B., ... Raedt, L. D.  
1205 (2011). Leave-One-Out Cross-Validation. In C. Sammut & G. I. Webb (Eds.),  
1206 *Encyclopedia of Machine Learning* (pp. 600–601). [https://doi.org/10.1007/978-0-387-](https://doi.org/10.1007/978-0-387-30164-8_469)  
1207 [30164-8\\_469](https://doi.org/10.1007/978-0-387-30164-8_469)

- 1208 Wojtowicz, M., Berrigan, L. I., & Fisk, J. D. (2012). Intra-individual Variability as a Measure of  
1209 Information Processing Difficulties in Multiple Sclerosis. *International Journal of MS*  
1210 *Care*, 14(2), 77–83. <https://doi.org/10.7224/1537-2073-14.2.77>
- 1211 Xu, J., Moeller, S., Auerbach, E. J., Strupp, J., Smith, S. M., Feinberg, D. A., ... Uğurbil, K.  
1212 (2013). Evaluation of slice accelerations using multiband echo planar imaging at 3T.  
1213 *NeuroImage*, 83, 991–1001. <https://doi.org/10.1016/j.neuroimage.2013.07.055>
- 1214 Yeo, B. T. T., Krienen, F. M., Eickhoff, S. B., Yaakub, S. N., Fox, P. T., Buckner, R. L., ...  
1215 Chee, M. W. L. (2015). Functional Specialization and Flexibility in Human Association  
1216 Cortex. *Cerebral Cortex*, 25(10), 3654–3672. <https://doi.org/10.1093/cercor/bhu217>
- 1217 Yeo, B. T. T., Krienen, F. M., Sepulcre, J., Sabuncu, M. R., Lashkari, D., Hollinshead, M., ...  
1218 Buckner, R. L. (2011). The organization of the human cerebral cortex estimated by  
1219 intrinsic functional connectivity. *Journal of Neurophysiology*, 106(3), 1125–1165.  
1220 <https://doi.org/10.1152/jn.00338.2011>
- 1221 Yeo, B. T. T., Tandi, J., & Chee, M. W. L. (2015). Functional connectivity during rested  
1222 wakefulness predicts vulnerability to sleep deprivation. *NeuroImage*, 111, 147–158.  
1223 <https://doi.org/10.1016/j.neuroimage.2015.02.018>
- 1224 Yoo, K., Rosenberg, M. D., Hsu, W.-T., Zhang, S., Li, C.-S. R., Scheinost, D., ... Chun, M. M.  
1225 (2017). Connectome-based predictive modeling of attention: Comparing different  
1226 functional connectivity features and prediction methods across datasets. *NeuroImage*.  
1227 <https://doi.org/10.1016/j.neuroimage.2017.11.010>
- 1228 Zalesky, A., Fornito, A., & Bullmore, E. T. (2010). Network-based statistic: Identifying  
1229 differences in brain networks. *NeuroImage*, 53(4), 1197–1207.  
1230 <https://doi.org/10.1016/j.neuroimage.2010.06.041>

## Legends

1231  
1232 Table 1. Schedule of tasks and data used in analysis. Participants were encouraged to take breaks  
1233 between the tasks to prevent fatigue. With the exception of the Raven's Progressive Matrices  
1234 test, each task was performed twice on non-successive days. Task domains and tasks were as  
1235 follows. Attentional Blink: Visual Attentional Blink (VAB) and Auditory Attentional Blink  
1236 (AAB). Sustained Attention: Visual Sustained Attention to Response Task (VSART), Auditory  
1237 Sustained Attention to Response Task (ASART), and Gradual-onset Continuous Performance  
1238 Task (GradCPT). Selective Attention: Attentional Network Task (ANT). Fluid Intelligence:  
1239 Raven's Progressive Matrices test (Raven's).

1240  
1241 Figure 1. Experimental paradigm for the visual attentional blink (VAB) task. Participants  
1242 identified a target and then detected a probe within a stream of distractors, responding when  
1243 prompted at the conclusion of the stream. The target was a red letter, the probe was a white letter  
1244 X, and distractors were other white letters. The auditory attentional blink (AAB) task was  
1245 similar, save targets were complex tones, the probe was a high-pitched pure tone, and distractors  
1246 were other pure tones. SOA = stimulus onset asynchrony.

1247  
1248 Table 2. Summary of behavioral metrics, including their task domain and a description of their  
1249 calculation. Raw values for ANTerr, ANTrtvar and ANTCert were re-coded such that larger  
1250 values indicated better task performance.

1251  
1252 Figure 2. Procedure for Connectome-based Predictive Model (CPM) construction in the current  
1253 study (adapted from Shen et al., 2017). CPMs predict individual differences in behavior from



1254 functional connectivity information. (a) Functional connectivity matrices and a behavioral score  
1255 of interest for each participant were calculated. One pair was held out of model construction for  
1256 each round of leave-one-out cross-validation (LOOCV) (Webb et al., 2011). (b) Functional  
1257 connectivity edges were correlated with behavior across participants. (c) Edges that correlated  
1258 most strongly, either positively or negatively, were selected. (d) Values from selected edges were  
1259 summed separately for positive and negative network edges, yielding two network strengths for  
1260 each participant. (e) A linear regression model relating (rank) network strengths to (rank)  
1261 behavioral scores was computed. (f) The model was tested on a novel, out-of-sample participant  
1262 (the individual left out in step (a)). After repeating steps a-f for each participant, the model was  
1263 evaluated by correlating the predicted behavioral scores with the actual scores.

1264

1265 Figure 3. Accuracy scores (probe hit rates) for the VAB and AAB. Note the substantial  
1266 impairment for the short target-probe lags (1, 2, and 3) in each session, especially for the VAB.  
1267 Error bars represent standard error of the mean (SEM).

1268

1269 Table 3. Summary of behavioral data. Test-retest reliability (Spearman correlations across  
1270 sessions) was high for most metrics and significant for all ( $ps < .002$ ). Jarque-Bera tests indicated  
1271 some significant departures from normality. Metrics are presented before re-coding. Metrics that  
1272 were subsequently reversed so that larger values would indicate better task performance are  
1273 marked with an asterisk (\*).  $N = 73$  for all metrics except AABresid ( $N = 71$ ).

1274

1275 Figure 4. Behavioral score distributions and correlations. (Above diagonal) Spearman correlation  
1276 coefficients for pairs of behavioral metrics. Most significant correlations were found within task

1277 domains, but some metrics correlated across the Sustained and Selective Attention domains. In  
1278 contrast, Attentional Blink and Fluid Intelligence metrics largely did not correlate with other  
1279 metrics. Since the purpose of this analysis was to identify any behavioral relationships that might  
1280 explain subsequent CPM results, no correction for multiple comparisons was applied.  $*p < .05$ ,  
1281  $**p < .01$ . Red and blue shading indicates positive and negative relationships, respectively.  
1282 (Diagonal) Histograms of behavioral data. The behavioral data had been re-coded so that larger  
1283 values indicate better task performance for each measure. (Below diagonal) Scatterplots for each  
1284 pair of behavioral metrics.

1285  
1286 Figure 5. Functional connectivity (FC) matrices. Each edge was Fisher-transformed, and the  
1287 resulting  $z$ -scores were averaged across participants. Edges found to correlate with motion were  
1288 set to zero. (a) VAB task FC matrix (VABFC). (b) Resting-state FC matrix (RSFC). VABFC and  
1289 RSFC patterns were similar to one another and to other data sets (Yeo et al., 2011; Yeo, Tandi, et  
1290 al., 2015). (c) Difference FC matrix (VABFC - RSFC), showing edges that were significant at  $p$   
1291 = .05, corrected for multiple comparisons using network-based statistics. Differences between  
1292 FC matrices were small, though they notably included connections linking the Salience/Ventral  
1293 attention and the Dorsal attention networks. The 419 parcellations from the FC matrices were  
1294 matched to 17 network labels (Yeo et al., 2011) (green labels), from which they were aggregated  
1295 into eight cortical groups (Yeo, Tandi, et al., 2015) and a subcortical group (blue labels, spelled  
1296 out in full in (a)). Subcortical regions include the brain stem, accumbens area, amygdala,  
1297 caudate, cerebellum, ventral diencephalon, hippocampus, pallidum, putamen, and thalamus. For  
1298 the green labels, letters represent the networks within the corresponding group, e.g., a(Default

1299 A), b(Default B), c(Default C), tp(TempPar), t(temporal pole in limbic region), o(orbital frontal  
1300 cortex in limbic region), p(peripheral visual area), c(central visual area), and sc(subcortical).

1301

1302 Figure 6. Behavioral predictions from CPMs. Each point represents a pair of Spearman's rank  
1303 correlation coefficients ( $r_s$ ) computed between observed and predicted behavioral scores for a  
1304 given model type. (a) Predictions from vabCPMs, which were trained with VABFC and  
1305 VABresid. Note the successful positive predictions for the VAB and Fluid Intelligence, but  
1306 successful *negative* predictions for some Selective and Sustained Attention metrics. (b)  
1307 Predictions from task-specific models. Many models could successfully predict behavioral  
1308 performance, though results often varied greatly across the FC source. For both panels, the dark  
1309 gray region indicates where  $r_s$  values are significant at the  $p = .01$  level, and the lighter gray  
1310 region indicates where  $r_s$  values are significant at the  $p = .05$  level (uncorrected, with  $d.f. = 71$ ).

1311 The  $r_s$  values and corresponding  $p$ -values are tabulated in Figure 6-1 in Extended Data. A  
1312 standard edge selection threshold ( $r_{\text{threshold}} = .232, p = .05$ ) was used for all models, though  
1313 results were similar across a wide range of threshold values (Figure 6-2 and Figure 6-3 in  
1314 Extended Data). Finally, as  $p$ -values from LOOCV procedures can be biased, we verified our  
1315 results for the VAB using permutation testing; significance from this method and parametric  
1316 approaches was consistent across edge selection thresholds (Figure 6-4 in in Extended Data).

1317

1318 Figure 7. Comparison of predictions from the vabCPM and saCPM. Each point represents a pair  
1319 of Spearman's rank correlation coefficients ( $r_s$ ) computed between observed and predicted  
1320 behavioral scores for a given model type. (a) Predictions from VABFC data. Note the saCPM's  
1321 successful positive predictions for some Selective and Sustained Attention metrics, with a

1322 successful *negative* prediction for the VAB. As noted above, the prediction directions were  
1323 reversed for the vabCPM; indeed, the prediction points fall close to the diagonal. (b) Predictions  
1324 from RSFC data. The vabCPM and saCPM predictions went in opposite directions, and were  
1325 generally similar to the predictions from the VABFC. For both panels, the dark gray region  
1326 indicates where  $r_s$  values are significant at the  $p = .01$  level, and the lighter gray region indicates  
1327 where  $r_s$  values are significant at the  $p = .05$  level (uncorrected, with  $d.f. = 71$ ). The edge  
1328 selection threshold ( $r_{\text{threshold}}$ ) corresponded to  $p = .05$  for all models. The  $r_s$  values and  
1329 corresponding  $p$ -values for the saCPM are tabulated in Figure 7-1 in the Extended Data. (See  
1330 Figure 6 for additional vabCPM details.)

1331  
1332 Figure 8. Percentage of edge overlap between networks from selected pairs of CPMs. Each task-  
1333 specific model was based on VABFC data (Model type C). Model pairs with statistically  
1334 significant overlap ( $p < .05$ , FDR corrected) are indicated in bold. Positive network edges  
1335 predicted better behavioral performance for their associated metric, whereas negative network  
1336 edges predicted worse behavioral performance. Overlap between *similar* network edges, (a)  
1337 positive-positive and (b) negative-negative. Sustained Attention (including the saCPM) and  
1338 Selective Attention models overlap primarily on similar edges, as do Fluid Intelligence and the  
1339 vabCPM. Overlap between *opposing* network edges, (c) negative-positive and (d) positive-  
1340 negative. The vabCPM network primarily overlaps with Sustained Attention (including the  
1341 saCPM) and Selective Attention on their opposing edges. Only task metrics that were  
1342 significantly predicted by vabCPMs using VABFC information are shown. The full set of  
1343 overlaps for all CPMs can be found in the Extended Data (Figure 8-1, 8-2, 8-3, and 8-4). Note

1344 that the highest overlap value for any pairwise comparison, including each task metric predicted  
1345 from VABFC and RSFC, was 26.5%.

1346

1347 Figure 9. Anatomical locations of predictive attentional network edges. Each cell represents the  
1348 number of shared connections between a pair of network groups, expressed as a percentage of  
1349 the number of possible connections between that pair. For details about network groups, see  
1350 Figure 5. (a) Positive and (b) negative VAB network edges. (c) Negative and (d) positive SA  
1351 network edges. The panel order has been reversed for easier comparison with the opposing edges  
1352 from the VAB network. (e) Positive VAB network edges and negative SA network edges (i.e.  
1353 overlaps between (a) and (c)). (f) Negative VAB network edges and positive SA network edges  
1354 (i.e. overlaps between (b) and (d)). Overlap percentages were numerically small, but included  
1355 key network groups, particularly Default and Salience / Ventral Attention (Sal/VentAttn).

1356

1357 Table 1-1. Detailed protocol from the full study from which the present data derives.

1358

1359 Figure 6-1. Behavioral predictions from CPMs. Values indicate  $r_s$  and uncorrected, two-tailed  $p$ -  
1360 values from Spearman's partial rank correlation, computed between predicted and observed  
1361 behavioral scores, controlled for motion. The  $p$ -value corresponding to each  $r_s$  was found by  
1362 transforming the correlation coefficients to Student's  $t$  values by the `partialcorr.m` function in  
1363 (*MATLAB*, 2014). Degrees of freedom for these tests were 66 for Models A and C, and 61 for  
1364 Models B and D. (For AABresid, these  $d.f.$  values were 2 lower.) Note that all task scores had  
1365 been re-oriented so that larger values indicate better task performance.

1366

1367 Figure 6-2. CPM predictions for models trained with VAB functional connectivity and  
1368 behavioral data (Model types A and B) across edge selection thresholds. Within each subplot, the  
1369 y-axis represents Spearman's rank correlation values,  $r_s$ , computed between predicted and  
1370 observed task performance, controlled for motion. Horizontal gray lines indicate the  
1371 corresponding  $p = .01, .05, .10, .10, .05, .01$  (top to bottom) uncorrected levels of significance  
1372 from standard  $r$ -to- $p$  conversions,  $d.f. = 71$  (69 for AAB). The x-axis represents edge selection  
1373 thresholds,  $r_{\text{threshold}}$ . The vertical gray line indicates the  $r_{\text{threshold}}$  at the  $p = .05$  level of  
1374 significance,  $d.f. = 70$  (68 for AAB) due to one left-out participant during training. X-axis labels  
1375 at the top of each plot indicate the average number of edges selected across all leave-one-out  
1376 iterations at the corresponding  $r_{\text{threshold}}$  on the bottom x-axis.

1377

1378 Figure 6-3. CPM predictions for models trained from task-specific behavioral data (Model types  
1379 C and D) across edge selection thresholds. Within each subplot, the y-axis represents Spearman's  
1380 rank correlation values,  $r_s$ , computed between predicted and observed task performance,  
1381 controlled for motion. Horizontal gray lines indicate the corresponding  $p = .01, .05, .10, .10, .05,$   
1382  $.01$  (top to bottom) uncorrected levels of significance from standard  $r$ -to- $p$  conversions,  $d.f. = 71$   
1383 (69 for AAB). The x-axis represents edge selection thresholds,  $r_{\text{threshold}}$ . The vertical gray line  
1384 indicates the  $r_{\text{threshold}}$  at the  $p = .05$  level of significance,  $d.f. = 70$  (68 for AAB) due to one left-  
1385 out participant during training. X-axis labels at the top of each plot indicate the average number  
1386 of edges selected across all leave-one-out iterations at the corresponding  $r_{\text{threshold}}$  on the bottom x-  
1387 axis.

1388

1389 Figure 6-4. Permutation results of predicting VABresid data from VAB FC information, using  
1390 the vabCPM (Model type A). The black line indicates Spearman's rank correlation values ( $r_s$ )  
1391 computed between predicted and observed task performance, controlled for motion. Horizontal  
1392 gray lines indicate the corresponding  $p = .01, .05, .10, .10, .05, .01$  (top to bottom) uncorrected  
1393 levels of significance from standard  $r$ -to- $p$  conversions, based on  $N = 73$ . Green sections indicate  
1394  $p < .05$  level of significance from permutation testing. Magenta sections indicate  $p \geq .05$  level  
1395 of significance from permutation testing. Our analysis demonstrates a high level of consistency  
1396 in the significance of  $r_s$  values between using standard  $r$ -to- $p$  conversions (black line) and using  
1397 permutation testing (green/magenta line) for the majority of edge selection thresholds.

1398

1399 Figure 7-1. Results of applying the saCPM model to data in the present study. Values indicate  $r_s$   
1400 and uncorrected, two-tailed  $p$ -values from Spearman's rank correlation, computed between  
1401 predicted and observed behavioral scores. The  $p$ -value corresponding to each  $r_s$  was found using  
1402 standard  $r$ -to- $p$  conversions, with  $d.f. = 71$  (69 for AABresid). All task scores had been re-coded  
1403 so that larger values indicate better task performance.

1404

1405 Figure 8-1. Percentage of edge overlap for positive network edges between each pair of models.  
1406 The value within each cell indicates the percentage of overlap between the pair of models on the  
1407 corresponding x and y axes. Overlaps between the vabCPM (saCPM) with the other models are  
1408 illustrated in the column (row) bounded in the red (black) of each plot. Axes labels also reflect  
1409 the FC-Task pair used for training the task-specific model.

1410

1411 Figure 8-2. Percentage of edge overlap for negative network edges between each pair of models.  
1412 The value within each cell indicates the percentage of overlap between the pair of models on the  
1413 corresponding x and y axes. Overlaps between the vabCPM (saCPM) with the other models are  
1414 illustrated in the column (row) bounded in the red (black) of each plot. Axes labels also reflect  
1415 the FC-Task pair used for training the task-specific model.

1416

1417 Figure 8-3. Percentage of edge overlap between negative network (y-axis) and positive network  
1418 (x-axis) edges. The value within each cell indicates the percentage of overlap between the pair of  
1419 models on the corresponding x and y axes. Overlaps between the vabCPM (saCPM) with the  
1420 other models are illustrated in the column (row) bounded in the red (black) of each plot. Axes  
1421 labels also reflect the FC-Task pair used for training the task-specific model.

1422

1423 Figure 8-4. Percentage of edge overlap between positive network (y-axis) and negative network  
1424 (x-axis) edges. The value within each cell indicates the percentage of overlap between the pair of  
1425 models on the corresponding x and y axes. Overlaps between the vabCPM (saCPM) with the  
1426 other models are illustrated in the column (row) bounded in the red (black) of each plot. Axes  
1427 labels also reflect the FC-Task pair used for training the task-specific model.

1428



1429

## Extended Data

1430 Table 1-1. Detailed protocol from the full study from which the present data derives.

| Session | Tasks/ Questionnaires                                                                                                                                                                                                                  | Session Description                                                                                                                                                                                                                                                                                                                                                                                                                                          | Session Dur (hr) |
|---------|----------------------------------------------------------------------------------------------------------------------------------------------------------------------------------------------------------------------------------------|--------------------------------------------------------------------------------------------------------------------------------------------------------------------------------------------------------------------------------------------------------------------------------------------------------------------------------------------------------------------------------------------------------------------------------------------------------------|------------------|
| 1       | Visual Attentional Blink (VAB) task                                                                                                                                                                                                    | Participants were briefed on the study protocol in the first session and completed a target-probe Attentional Blink (AB) task to obtain a measure of baseline performance. Participants were only eligible to continue with the subsequent sessions if they obtained an average of 75% and above for target discrimination accuracy in the first session. Participants were not informed about their performance until the end of all experimental sessions. | 1                |
| 2       | Visual AB and surprise-induced blindness (SiB) task (in-scanner)<br>Short-Sleep Questionnaire<br>Visual Sustained Attention to Response task (12 mins)<br>Attentional Network Task (30 mins)<br>Theories of Intelligence Questionnaire | Participants had to return to the laboratory for the second session 3 to 14 days after the first session. The second session consisted of a 1.5 hr long fMRI scan. Task order was fixed across participants. No time limit was imposed on any of the questionnaires so participants could complete them at their own pace. All questionnaires were administered online using Qualtrics (Qualtrics, 2005).                                                    | 2.5              |
| 3       | Gradual-onset continuous Performance Task (15 mins)                                                                                                                                                                                    | The third session took place the day after the second session. Task order for the first 3 tasks was counterbalanced                                                                                                                                                                                                                                                                                                                                          | 2                |

|   |                                                                                                                                                                                                                                                                                       |                                                                                                                                                                                                                                                                            |   |
|---|---------------------------------------------------------------------------------------------------------------------------------------------------------------------------------------------------------------------------------------------------------------------------------------|----------------------------------------------------------------------------------------------------------------------------------------------------------------------------------------------------------------------------------------------------------------------------|---|
|   | Auditory Sustained Attention to Response task<br>(12 mins)                                                                                                                                                                                                                            | across participants.                                                                                                                                                                                                                                                       |   |
|   | Auditory AB and Surprise-induced deafness (SiD) task                                                                                                                                                                                                                                  |                                                                                                                                                                                                                                                                            |   |
|   | Visual AB task                                                                                                                                                                                                                                                                        |                                                                                                                                                                                                                                                                            |   |
|   | Visual AB task with colour-salient training                                                                                                                                                                                                                                           |                                                                                                                                                                                                                                                                            |   |
| 4 | Visual AB and SiB task<br>Visual Sustained Attention to Response task<br>(12 mins)<br>Attentional Network Task<br>(30 mins)<br>Adult ADHD Self-Report Scale Questionnaire<br>Online Dimensional Change Card Sorting (DCCS) task<br>Raven's Progressive Matrices<br>Loss Aversion task | The fourth session took place the day after the third session.<br>The Raven's Progressive Matrices task was an adapted version of the actual task that only consisted of 9 questions with no time limit given.<br>Task order was fixed across participants.                | 2 |
| 5 | Gradual-onset continuous Performance Task<br>(15 mins)<br>Auditory Sustained Attention to Response task<br>(12 mins)<br>Auditory AB and Surprise-                                                                                                                                     | The fifth session took place the day after the fourth session.<br>Decision-making tasks included a cups task and an explore-exploit task.<br>Task order for the first three computerized tasks and questionnaires were counterbalanced and randomized across participants. | 2 |

---

|   |                                                                     |                                                                                                                                                                                                                                                                                                                                                                 |     |
|---|---------------------------------------------------------------------|-----------------------------------------------------------------------------------------------------------------------------------------------------------------------------------------------------------------------------------------------------------------------------------------------------------------------------------------------------------------|-----|
|   | induced deafness (SiD) task                                         |                                                                                                                                                                                                                                                                                                                                                                 |     |
|   | Media-Multitasking Video Game                                       |                                                                                                                                                                                                                                                                                                                                                                 |     |
|   | Questionnaire                                                       |                                                                                                                                                                                                                                                                                                                                                                 |     |
|   | Personality Inventory for DSM-5                                     |                                                                                                                                                                                                                                                                                                                                                                 |     |
|   | for adults                                                          |                                                                                                                                                                                                                                                                                                                                                                 |     |
|   | Wender Utah Rating Scale                                            |                                                                                                                                                                                                                                                                                                                                                                 |     |
|   | Musical background and                                              |                                                                                                                                                                                                                                                                                                                                                                 |     |
|   | experience questionnaire                                            |                                                                                                                                                                                                                                                                                                                                                                 |     |
|   | Decision-making tasks                                               |                                                                                                                                                                                                                                                                                                                                                                 |     |
|   | Demographic Questionnaire                                           |                                                                                                                                                                                                                                                                                                                                                                 |     |
| 6 | Visual AB and surprise-induced<br>blindness (SiB) task (in-scanner) | Session 6 was held between 5 to 14 days from the<br>second session and consisted of a 1.5 hr long fMRI<br>scan that used a protocol identical to that of the first<br>in-scanner session so as to investigate test-retest<br>reliability. Participants were encouraged to take<br>breaks between experimental blocks and between<br>tasks to alleviate fatigue. | 1.5 |

---

1432 Figure 6-1. Behavioral predictions from CPMs. Values indicate  $r_s$  and uncorrected, two-tailed  $p$ -  
 1433 values from Spearman's partial rank correlation, computed between predicted and observed  
 1434 behavioral scores, controlled for motion. The  $p$ -value corresponding to each  $r_s$  was found by  
 1435 transforming the correlation coefficients to Student's  $t$  values by the partialcorr.m function in  
 1436 (*MATLAB*, 2014). Degrees of freedom for these tests were 66 for Models A and C, and 61 for  
 1437 Models B and D. (For AABresid, these  $d.f.$  values were 2 lower.) Note that all task scores had  
 1438 been re-oriented so that larger values indicate better task performance.

|                     |               | Model A        |        | Model B        |        | Model C    |        | Model D   |        |     |
|---------------------|---------------|----------------|--------|----------------|--------|------------|--------|-----------|--------|-----|
| Task domain         | Train         | VABFC-VABresid |        | VABFC-VABresid |        | VABFC-Task |        | RSFC-Task |        |     |
|                     | Test          | VABFC-Task     |        | RSFC-Task      |        | VABFC-Task |        | RSFC-Task |        |     |
|                     |               | Task           | $r_s$  | $p$            | $r_s$  | $p$        | $r_s$  | $p$       | $r_s$  | $p$ |
| Attentional         | VABresid      | 0.308          | 0.011* | 0.123          | 0.338  | 0.308      | 0.011* | 0.148     | 0.228  |     |
| Blink               | AABresid      | 0.04           | 0.748  | -0.107         | 0.411  | 0.135      | 0.279  | -0.053    | 0.672  |     |
| Sustained Attention | VSARTdprime   | -0.268         | 0.027* | -0.19          | 0.135  | 0.245      | 0.044* | 0.062     | 0.617  |     |
|                     | ASARTdprime   | -0.062         | 0.617  | -0.212         | 0.096  | -0.021     | 0.866  | 0.201     | 0.1    |     |
|                     | GradCPTdprime | 0.058          | 0.637  | -0.097         | 0.451  | -0.265     | 0.029* | 0.226     | 0.063  |     |
| Selective Attention | ANTerr        | -0.33          | 0.006* | -0.308         | 0.014* | 0.346      | 0.004* | 0.14      | 0.256  |     |
|                     | ANTrtvar      | -0.36          | 0.003* | -0.414         | 0.001* | 0.24       | 0.049* | 0.232     | 0.057  |     |
|                     | ANTAert       | 0.051          | 0.682  | 0.141          | 0.269  | 0.033      | 0.787  | -0.061    | 0.619  |     |
|                     | ANToert       | 0.063          | 0.609  | 0.128          | 0.318  | 0.124      | 0.313  | 0.032     | 0.793  |     |
|                     | ANTcert       | -0.252         | 0.038* | -0.333         | 0.008* | 0.032      | 0.798  | 0.262     | 0.031* |     |
| Fluid Intelligence  | RavensAcc     | 0.245          | 0.044* | 0.224          | 0.077  | -0.125     | 0.31   | 0.374     | 0.002* |     |

1439

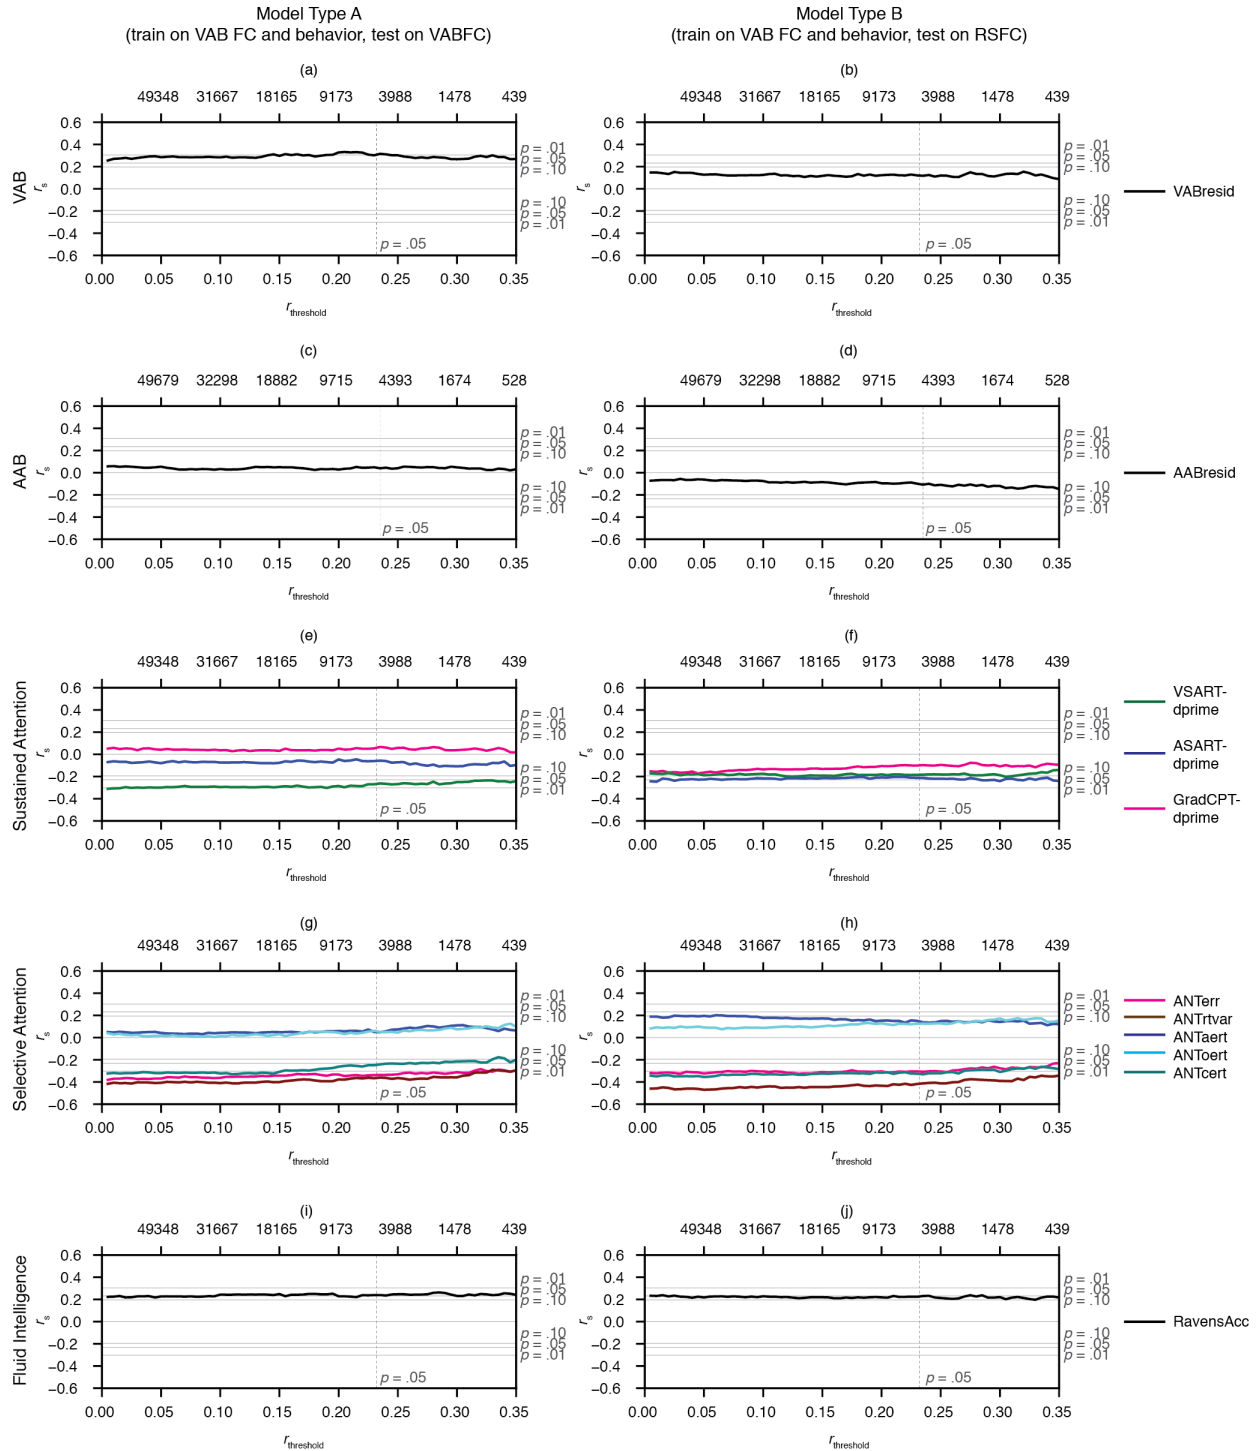

1440

1441 Figure 6-2. CPM predictions for models trained with VAB functional connectivity and

1442 behavioral data (Model types A and B) across edge selection thresholds. Within each subplot, the

1443 y-axis represents Spearman's rank correlation values,  $r_s$ , computed between predicted and  
1444 observed task performance, controlled for motion. Horizontal gray lines indicate the  
1445 corresponding  $p = .01, .05, .10, .10, .05, .01$  (top to bottom) uncorrected levels of significance  
1446 from standard  $r$ -to- $p$  conversions,  $df = 71$  (69 for AAB). The x-axis represents edge selection  
1447 thresholds,  $r_{\text{threshold}}$ . The vertical gray line indicates the  $r_{\text{threshold}}$  at the  $p = .05$  level of  
1448 significance,  $df = 70$  (68 for AAB) due to one left-out participant during training. X-axis labels  
1449 at the top of each plot indicate the average number of edges selected across all leave-one-out  
1450 iterations at the corresponding  $r_{\text{threshold}}$  on the bottom x-axis.

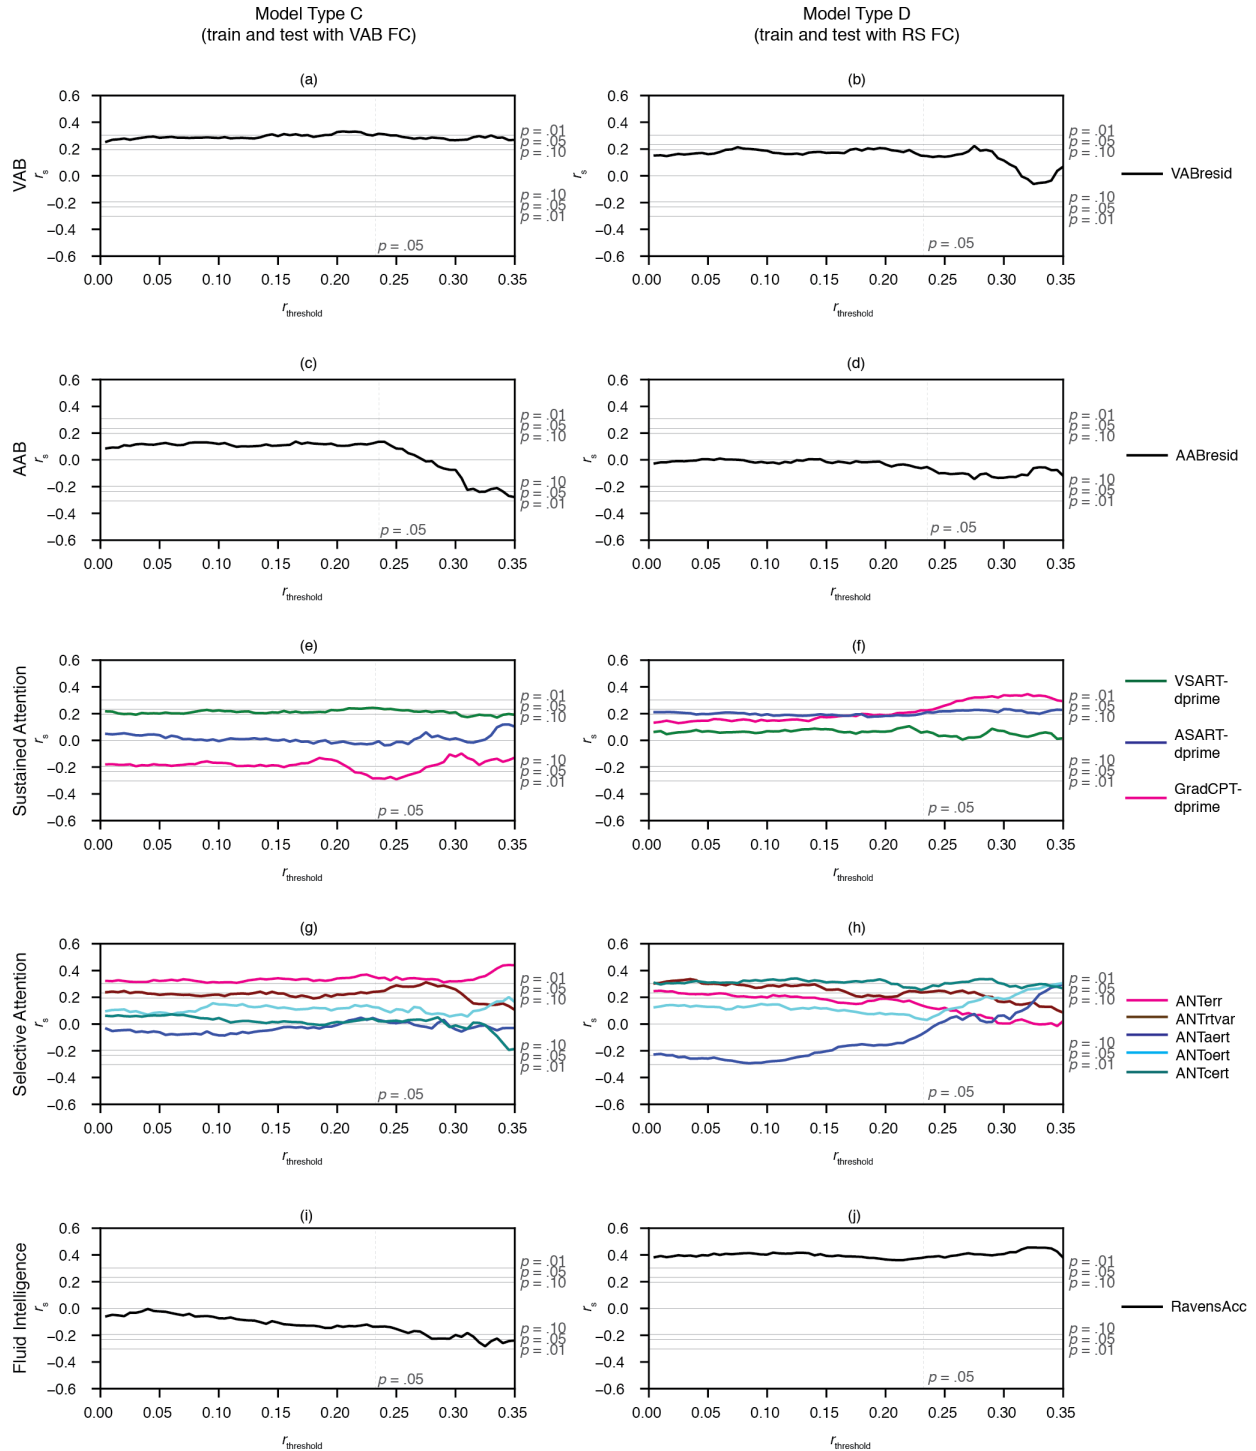

1451

1452 Figure 6-3. CPM predictions for models trained from task-specific behavioral data (Model types

1453 C and D) across edge selection thresholds. Within each subplot, the y-axis represents Spearman's

1454 rank correlation values,  $r_s$ , computed between predicted and observed task performance,  
 1455 controlled for motion. Horizontal gray lines indicate the corresponding  $p = .01, .05, .10, .10, .05,$   
 1456  $.01$  (top to bottom) uncorrected levels of significance from standard  $r$ -to- $p$  conversions,  $df = 71$   
 1457 (69 for AAB). The x-axis represents edge selection thresholds,  $r_{\text{threshold}}$ . The vertical gray line  
 1458 indicates the  $r_{\text{threshold}}$  at the  $p = .05$  level of significance,  $df = 70$  (68 for AAB) due to one left-  
 1459 out participant during training. X-axis labels at the top of each plot indicate the average number  
 1460 of edges selected across all leave-one-out iterations at the corresponding  $r_{\text{threshold}}$  on the bottom x-  
 1461 axis.  
 1462

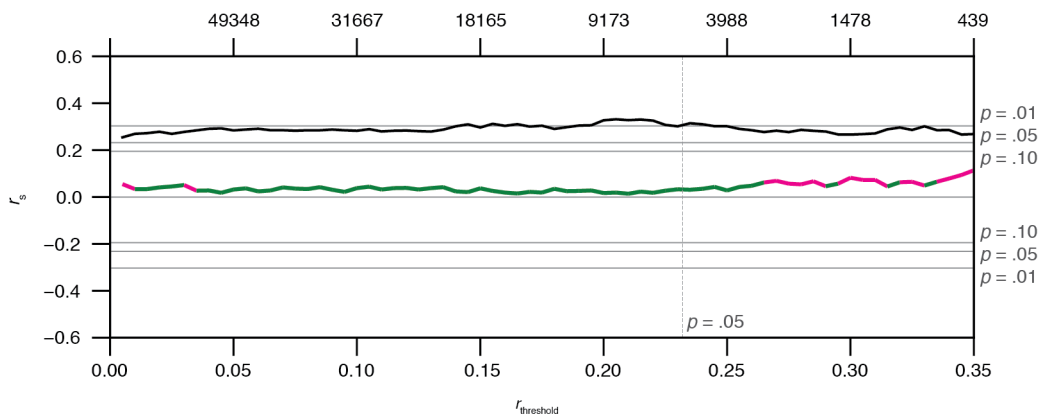

1463  
 1464 Figure 6-4. Permutation results of predicting VABresid data from VAB FC information, using  
 1465 the vabCPM (Model type A). The black line indicates Spearman's rank correlation values ( $r_s$ )  
 1466 computed between predicted and observed task performance, controlled for motion. Horizontal  
 1467 gray lines indicate the corresponding  $p = .01, .05, .10, .10, .05, .01$  (top to bottom) uncorrected  
 1468 levels of significance from standard  $r$ -to- $p$  conversions, based on  $N = 73$ . Green sections indicate  
 1469  $p < .05$  level of significance from permutation testing. Magenta sections indicate  $p \geq .05$  level  
 1470 of significance from permutation testing. Our analysis demonstrates a high level of consistency



1471 in the significance of  $r_s$  values between using standard  $r$ -to- $p$  conversions (black line) and using  
 1472 permutation testing (green/magenta line) for the majority of edge selection thresholds.

1473

1474 Figure 7-1. Results of applying the saCPM model to data in the present study. Values indicate  $r_s$   
 1475 and uncorrected, two-tailed  $p$ -values from Spearman's rank correlation, computed between  
 1476 predicted and observed behavioral scores. The  $p$ -value corresponding to each  $r_s$  was found using  
 1477 standard  $r$ -to- $p$  conversions, with  $df. = 71$  (69 for AABresid). All task scores had been re-coded  
 1478 so that larger values indicate better task performance.

| Task domain         | Task          | saCPM (VABFC) |        | saCPM (RSFC) |        |
|---------------------|---------------|---------------|--------|--------------|--------|
|                     |               | $r_s$         | $p$    | $r_s$        | $p$    |
| Attention Blink     | VABresid      | -0.235        | 0.045* | -0.155       | 0.191  |
|                     | AABresid      | 0.049         | 0.684  | -0.132       | 0.271  |
| Sustained Attention | VSARTdprime   | 0.278         | 0.018* | 0.271        | 0.021* |
|                     | ASARTdprime   | 0.117         | 0.323  | 0.290        | 0.013* |
|                     | GradCPTdprime | 0.027         | 0.822  | 0.086        | 0.469  |
| Selective Attention | ANTerr        | 0.322         | 0.005* | 0.156        | 0.189  |
|                     | ANTrtvar      | 0.329         | 0.005* | 0.270        | 0.021* |
|                     | ANTaert       | -0.057        | 0.629  | -0.099       | 0.405  |
|                     | ANToert       | -0.101        | 0.397  | -0.155       | 0.190  |
|                     | ANTcert       | 0.224         | 0.057  | 0.384        | 0.001* |
| Fluid Intelligence  | RavensAcc     | -0.059        | 0.620  | -0.229       | 0.052  |

1479



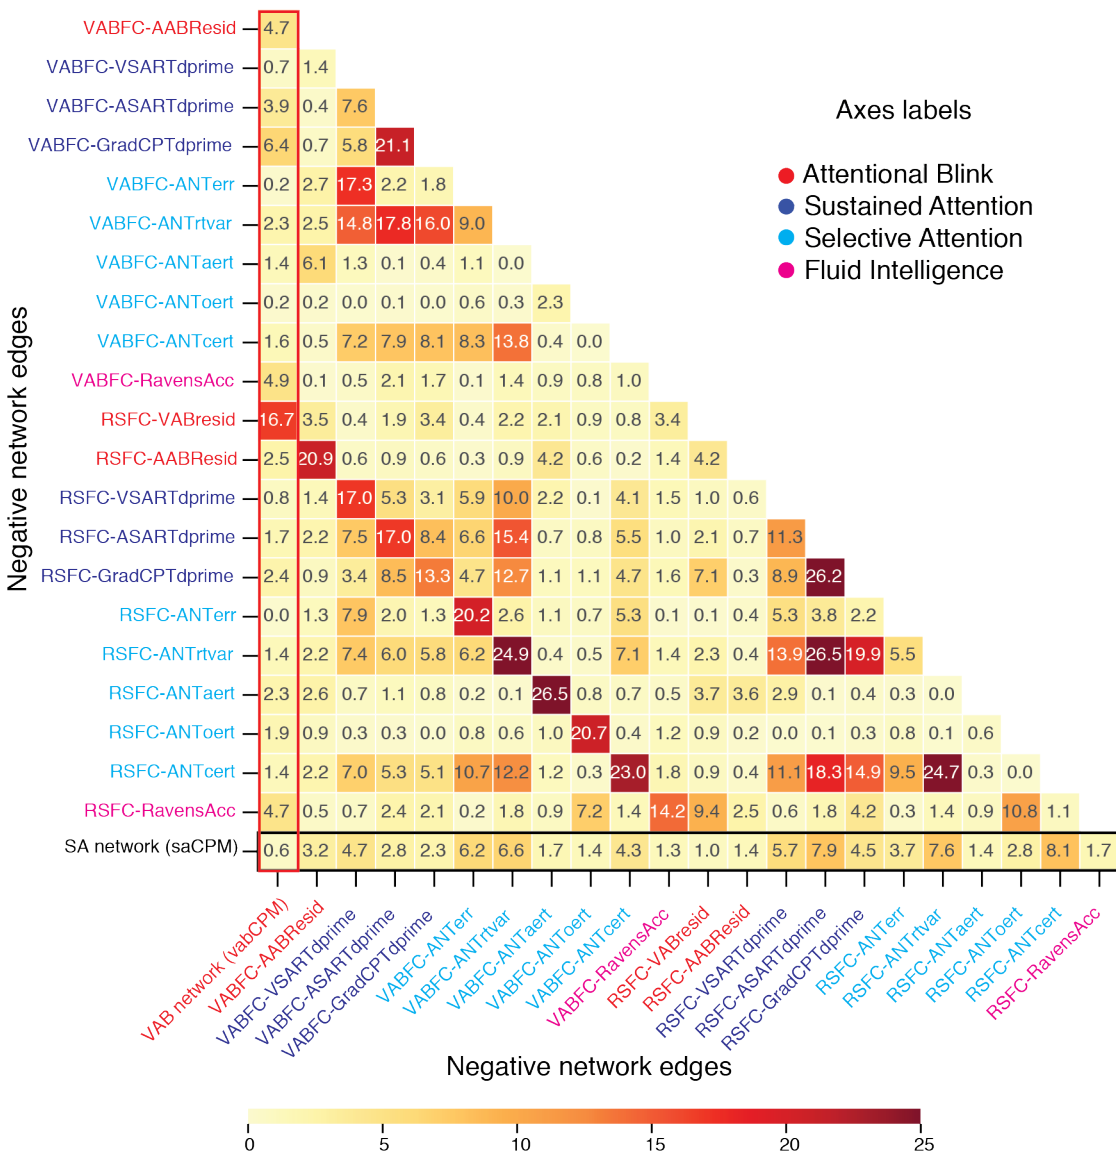

1487

1488 Figure 8-2. Percentage of edge overlap for negative network edges between each pair of models.

1489 The value within each cell indicates the percentage of overlap between the pair of models on the

1490 corresponding x and y axes. Overlaps between the vabCPM (saCPM) with the other models are

1491 illustrated in the column (row) bounded in the red (black) of each plot. Axes labels also reflect

1492 the FC-Task pair used for training the task-specific model.

1493

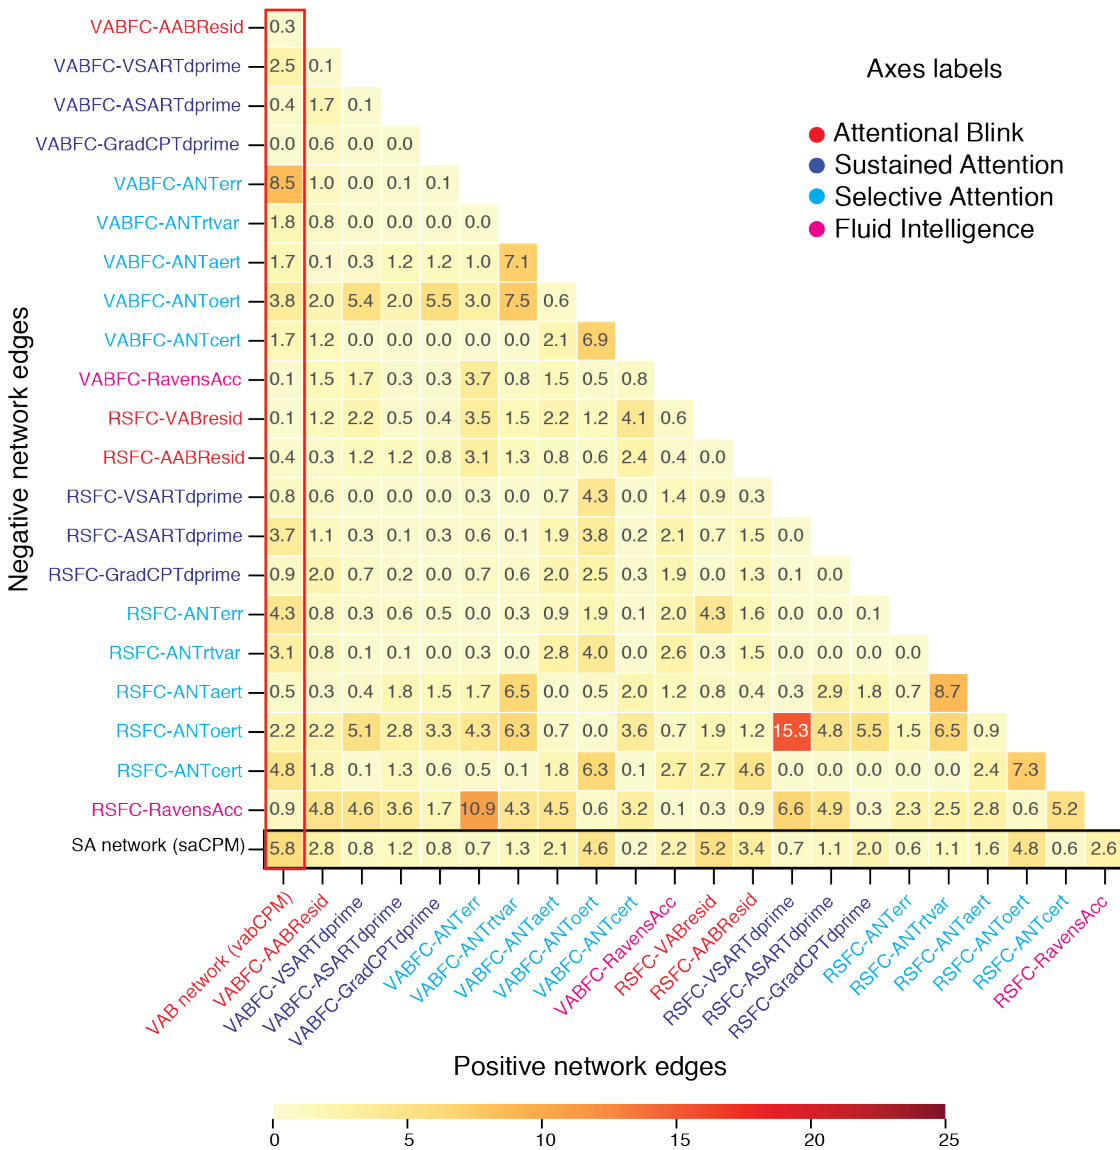

1494

1495 Figure 8-3. Percentage of edge overlap between negative network (y-axis) and positive network  
 1496 (x-axis) edges. The value within each cell indicates the percentage of overlap between the pair of  
 1497 models on the corresponding x and y axes. Overlaps between the vabCPM (saCPM) with the  
 1498 other models are illustrated in the column (row) bounded in the red (black) of each plot. Axes  
 1499 labels also reflect the FC-Task pair used for training the task-specific model.

1500

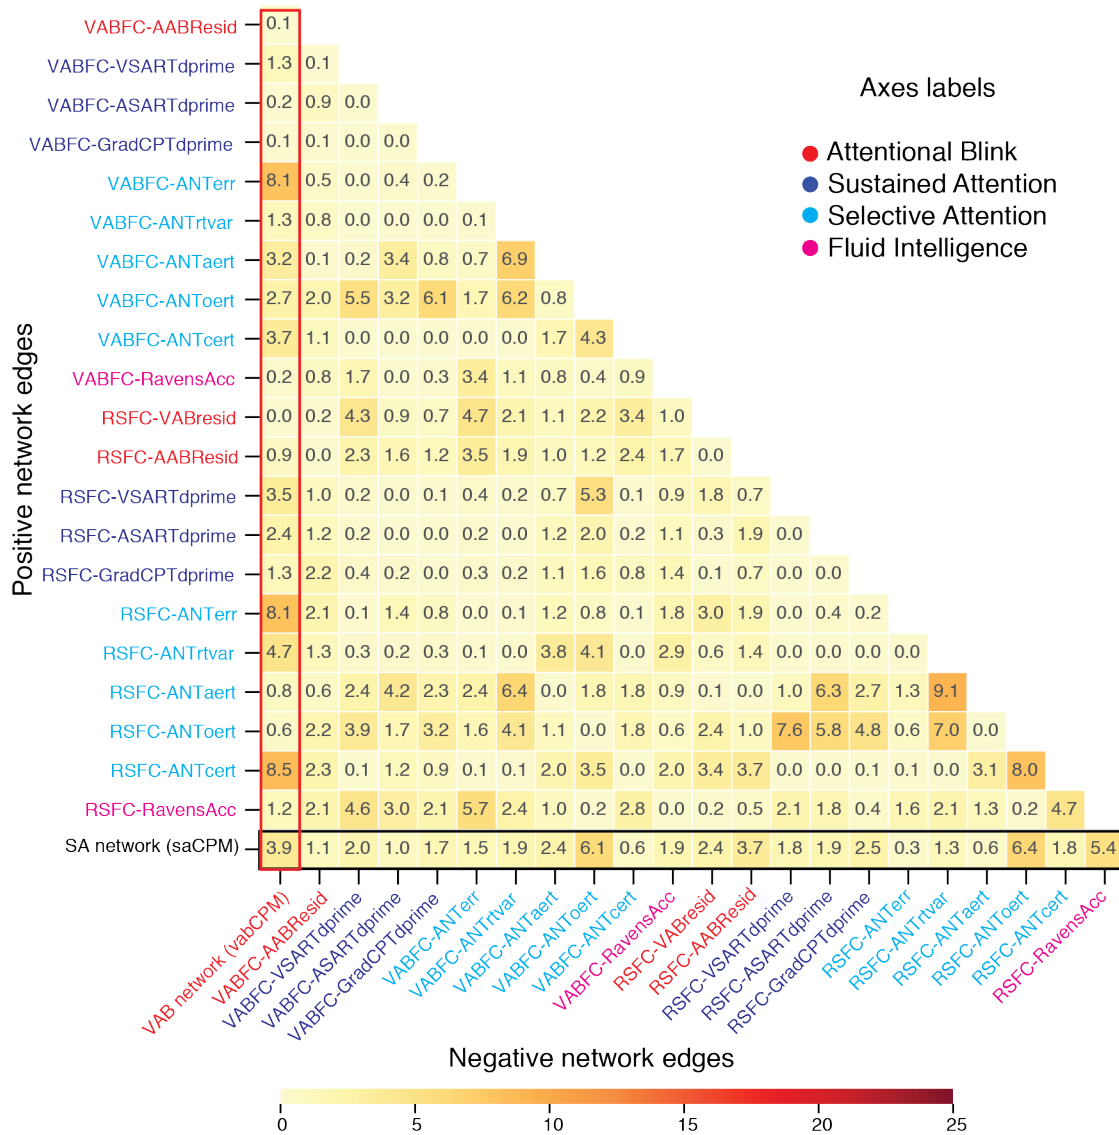

1501

1502

Figure 8-4. Percentage of edge overlap between positive network (y-axis) and negative network

1503

(x-axis) edges. The value within each cell indicates the percentage of overlap between the pair of

1504

models on the corresponding x and y axes. Overlaps between the vabCPM (saCPM) with the

1505

other models are illustrated in the column (row) bounded in the red (black) of each plot. Axes

1506

labels also reflect the FC-Task pair used for training the task-specific model.

1507
